# Supplementary material for: Rapid coral reef assessment using 3D modelling and acoustics: acoustic indices correlate to fish abundance, diversity and environmental indicators in West Papua, Indonesia
Source: PeerJ journal article supplement (doi:10.7717/peerj.10761), 2021-02-08
Supplement: S1_Temporal_stablility.pdf [file S1_Temporal_stablility.pdf]

## **S1. Correlation analysis for temporal stability of Acoustic indices over time**

Outputs for correlation coefficients and significance for each acoustic index when comparing;

1. Minutes 4 – 5
2. Minutes 5 – 6
3. Minutes 6 – 7
4. Minutes 4 – 7
5. The average value of 1 to 3 above

Note: Significance values of 0 refer to  $p < 0.00001$ . Figures indicate correlation (Direction as colour) and size as correlation coefficient. Blank squares show no significant correlation.

## AD High

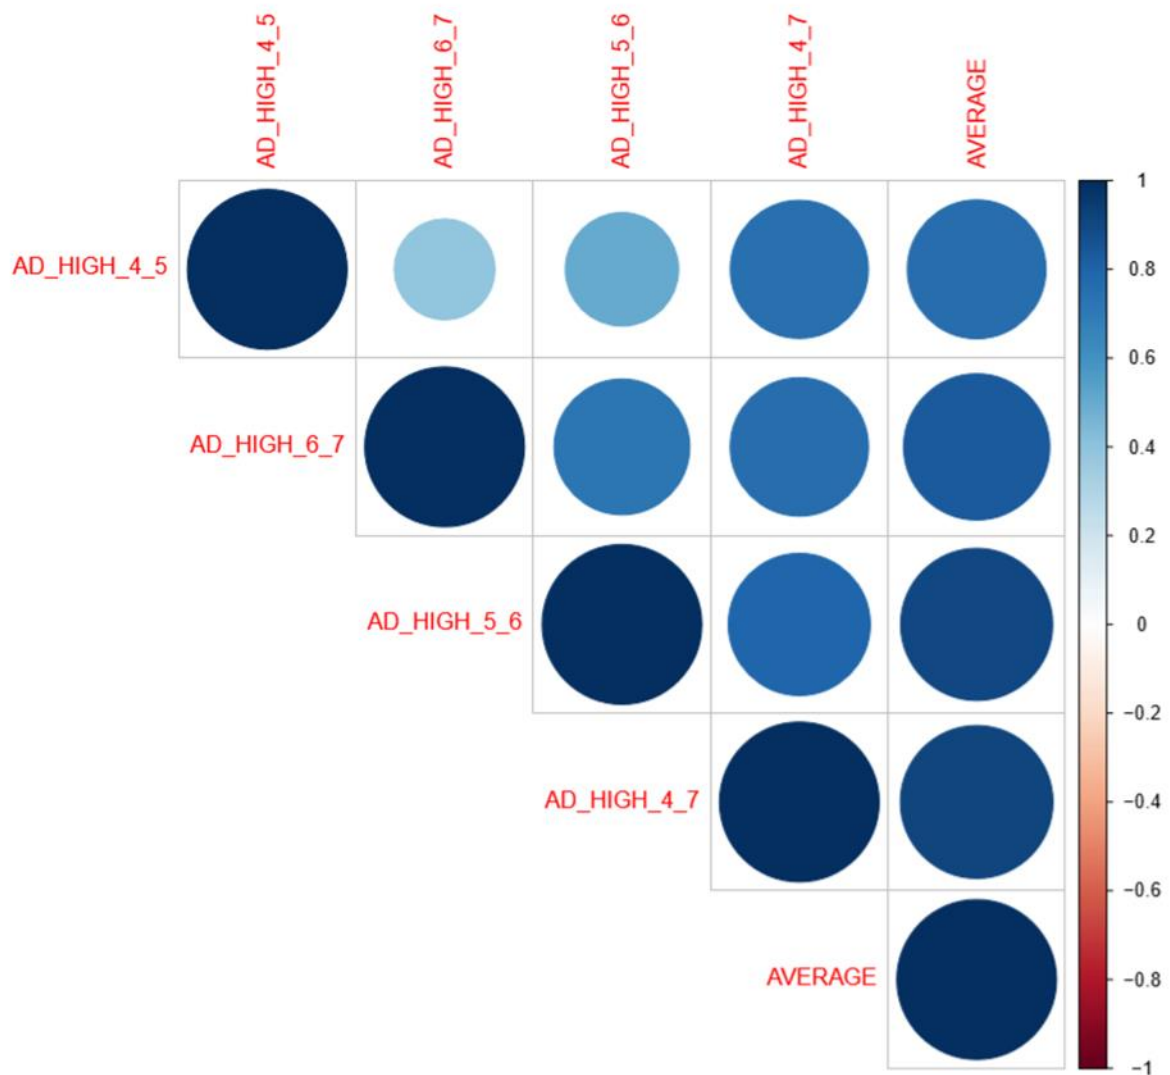

## Correlation Coefficients

|             | AD_HIGH_4_5 | AD_HIGH_5_6 | AD_HIGH_6_7 | AD_HIGH_4_7 | AVERAGE |
|-------------|-------------|-------------|-------------|-------------|---------|
| AD_HIGH_4_5 | 1.00        | 0.50        | 0.40        | 0.75        | 0.75    |
| AD_HIGH_5_6 | 0.50        | 1.00        | 0.72        | 0.79        | 0.91    |
| AD_HIGH_6_7 | 0.40        | 0.72        | 1.00        | 0.75        | 0.84    |
| AD_HIGH_4_7 | 0.75        | 0.79        | 0.75        | 1.00        | 0.91    |
| AVERAGE     | 0.75        | 0.91        | 0.84        | 0.91        | 1.00    |

p-values

|             | AD_HIGH_4_5 | AD_HIGH_5_6 | AD_HIGH_6_7 | AD_HIGH_4_7 | AVERAGE |
|-------------|-------------|-------------|-------------|-------------|---------|
| AD_HIGH_4_5 |             | 0.0024      | 0.0193      | 0.0000      | 0.0000  |
| AD_HIGH_5_6 | 0.0024      |             | 0.0000      | 0.0000      | 0.0000  |
| AD_HIGH_6_7 | 0.0193      | 0.0000      |             | 0.0000      | 0.0000  |
| AD_HIGH_4_7 | 0.0000      | 0.0000      | 0.0000      |             | 0.0000  |
| AVERAGE     | 0.0000      | 0.0000      | 0.0000      | 0.0000      |         |

AD Low

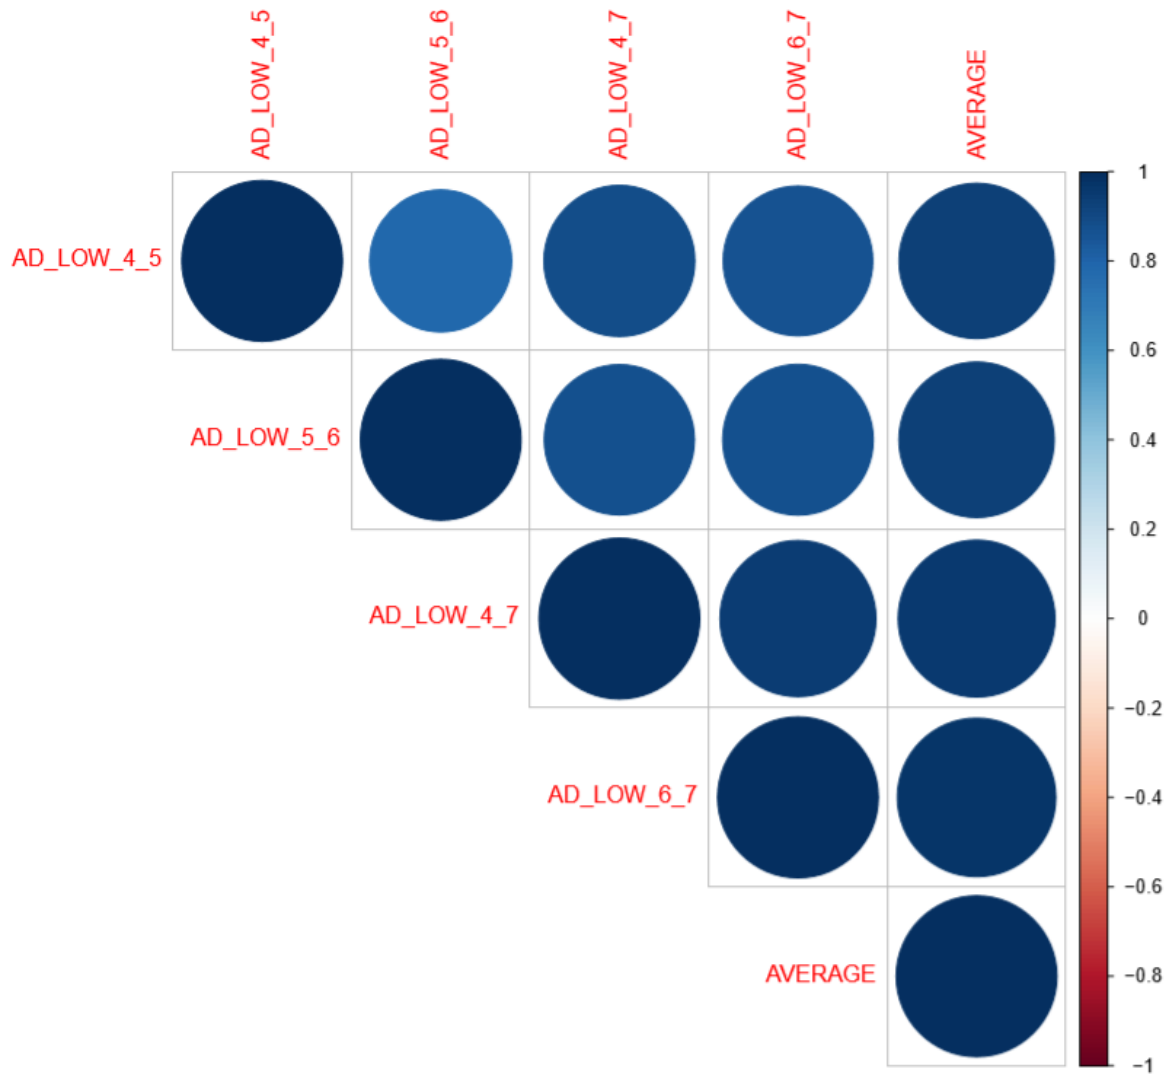

Correlation Coefficients

|            | AD_LOW_4_5 | AD_LOW_5_6 | AD_LOW_6_7 | AD_LOW_4_7 | AVERAGE |
|------------|------------|------------|------------|------------|---------|
| AD_LOW_4_5 | 1.00       | 0.78       | 0.87       | 0.88       | 0.93    |
| AD_LOW_5_6 | 0.78       | 1.00       | 0.88       | 0.87       | 0.93    |
| AD_LOW_6_7 | 0.87       | 0.88       | 1.00       | 0.94       | 0.97    |
| AD_LOW_4_7 | 0.88       | 0.87       | 0.94       | 1.00       | 0.95    |
| AVERAGE    | 0.93       | 0.93       | 0.97       | 0.95       | 1.00    |

p-values

|            | AD_LOW_4_5 | AD_LOW_5_6 | AD_LOW_6_7 | AD_LOW_4_7 | AVERAGE |
|------------|------------|------------|------------|------------|---------|
| AD_LOW_4_5 |            | 0          | 0          | 0          | 0       |
| AD_LOW_5_6 | 0          |            | 0          | 0          | 0       |
| AD_LOW_6_7 | 0          | 0          |            | 0          | 0       |
| AD_LOW_4_7 | 0          | 0          | 0          |            | 0       |
| AVERAGE    | 0          | 0          | 0          | 0          |         |

AD Ratio

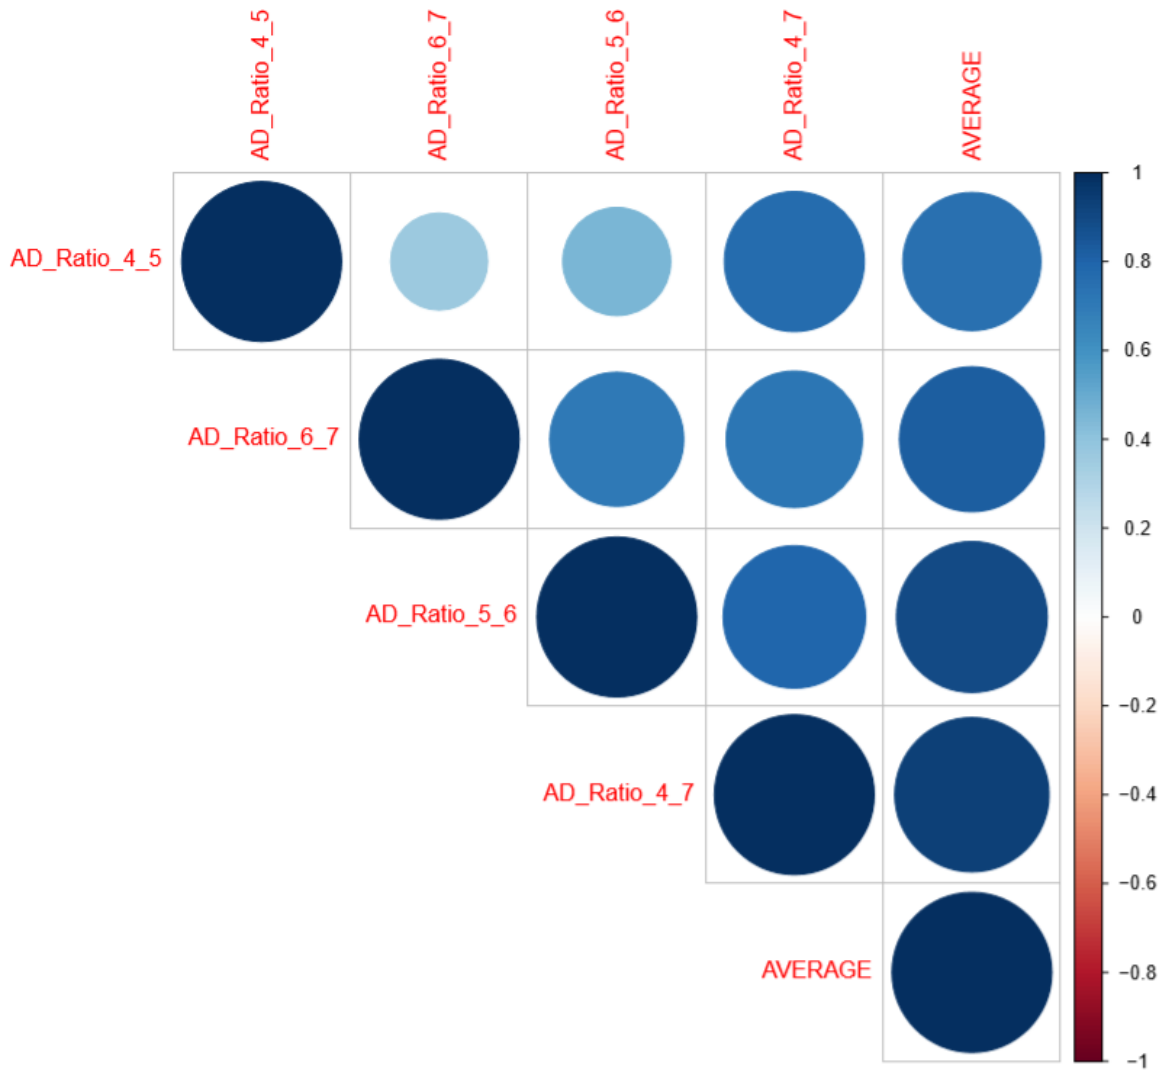

|              | AD_Ratio_4_5 | AD_Ratio_5_6 | AD_Ratio_6_7 | AD_Ratio_4_7 | AVERAGE |      |
|--------------|--------------|--------------|--------------|--------------|---------|------|
| AD_Ratio_4_5 |              | 1.00         | 0.46         | 0.37         | 0.77    | 0.75 |
| AD_Ratio_5_6 | 0.46         |              | 1.00         | 0.70         | 0.79    | 0.89 |
| AD_Ratio_6_7 | 0.37         | 0.70         |              | 1.00         | 0.73    | 0.82 |
| AD_Ratio_4_7 | 0.77         | 0.79         | 0.73         |              | 1.00    | 0.93 |
| AVERAGE      | 0.75         | 0.89         | 0.82         | 0.93         |         | 1.00 |

p-values

|              | AD_Ratio_4_5 | AD_Ratio_5_6 | AD_Ratio_6_7 | AD_Ratio_4_7 | AVERAGE |
|--------------|--------------|--------------|--------------|--------------|---------|
| AD_Ratio_4_5 |              | 0.0066       | 0.0316       | 0.0000       | 0.0000  |
| AD_Ratio_5_6 | 0.0066       |              | 0.0000       | 0.0000       | 0.0000  |
| AD_Ratio_6_7 | 0.0316       | 0.0000       |              | 0.0000       | 0.0000  |
| AD_Ratio_4_7 | 0.0000       | 0.0000       | 0.0000       |              | 0.0000  |
| AVERAGE      | 0.0000       | 0.0000       | 0.0000       | 0.0000       |         |

## AEI High

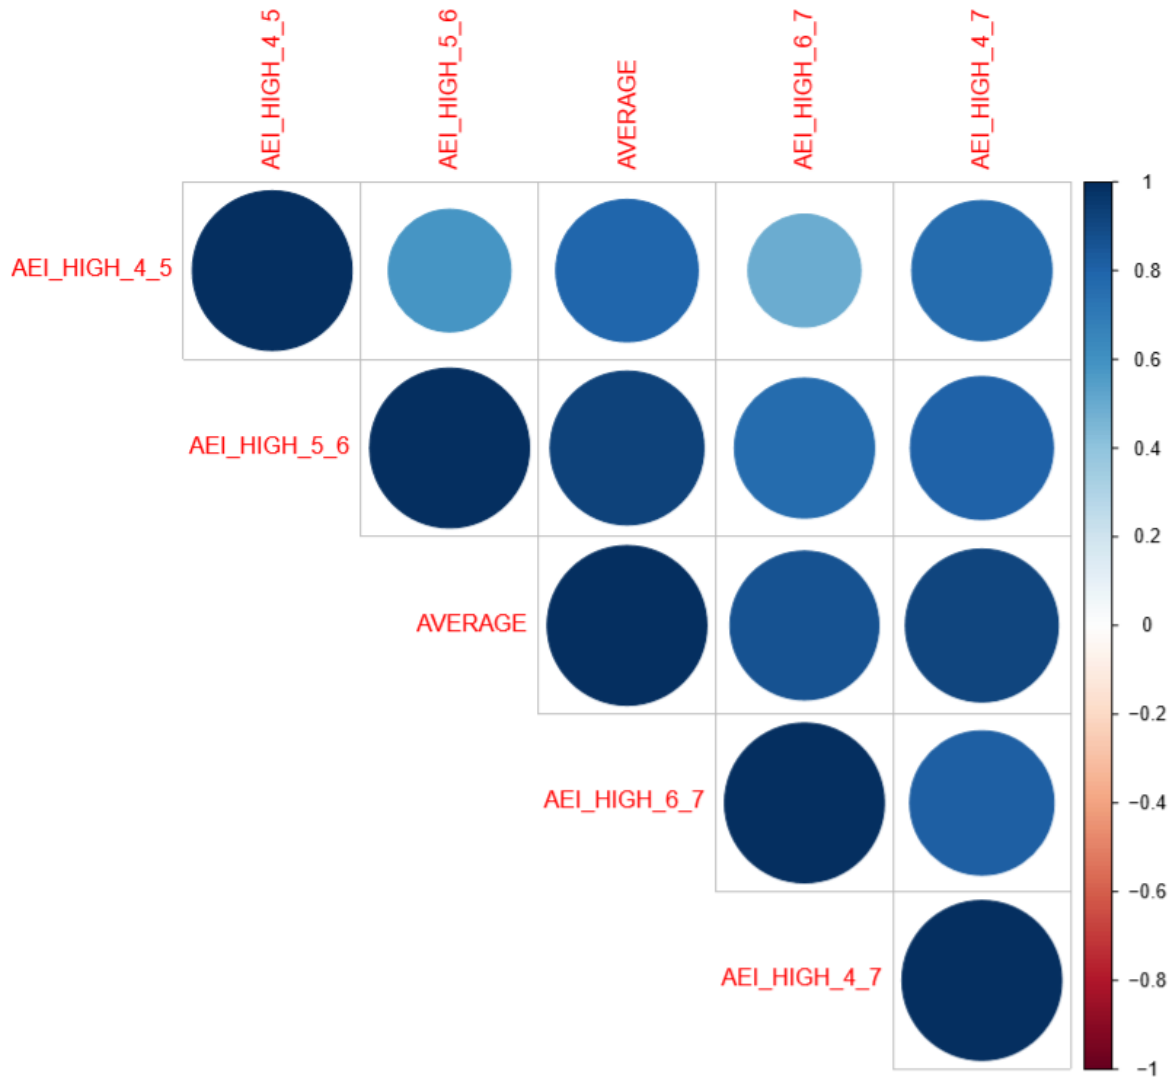

### Correlation Coefficients

|              | AEI_HIGH_4_5 | AEI_HIGH_5_6 | AEI_HIGH_6_7 | AEI_HIGH_4_7 | AVERAGE |
|--------------|--------------|--------------|--------------|--------------|---------|
| AEI_HIGH_4_5 | 1.00         | 0.59         | 0.50         | 0.77         | 0.79    |
| AEI_HIGH_5_6 | 0.59         | 1.00         | 0.77         | 0.80         | 0.93    |
| AEI_HIGH_6_7 | 0.50         | 0.77         | 1.00         | 0.81         | 0.87    |
| AEI_HIGH_4_7 | 0.77         | 0.80         | 0.81         | 1.00         | 0.92    |
| AVERAGE      | 0.79         | 0.93         | 0.87         | 0.92         | 1.00    |

### p-values

|              | AEI_HIGH_4_5 | AEI_HIGH_5_6 | AEI_HIGH_6_7 | AEI_HIGH_4_7 | AVERAGE |
|--------------|--------------|--------------|--------------|--------------|---------|
| AEI_HIGH_4_5 |              | 0.0003       | 0.0026       | 0.0000       | 0.0000  |
| AEI_HIGH_5_6 | 0.0003       |              | 0.0000       | 0.0000       | 0.0000  |
| AEI_HIGH_6_7 | 0.0026       | 0.0000       |              | 0.0000       | 0.0000  |
| AEI_HIGH_4_7 | 0.0000       | 0.0000       | 0.0000       |              | 0.0000  |
| AVERAGE      | 0.0000       | 0.0000       | 0.0000       | 0.0000       |         |

## AEI Low

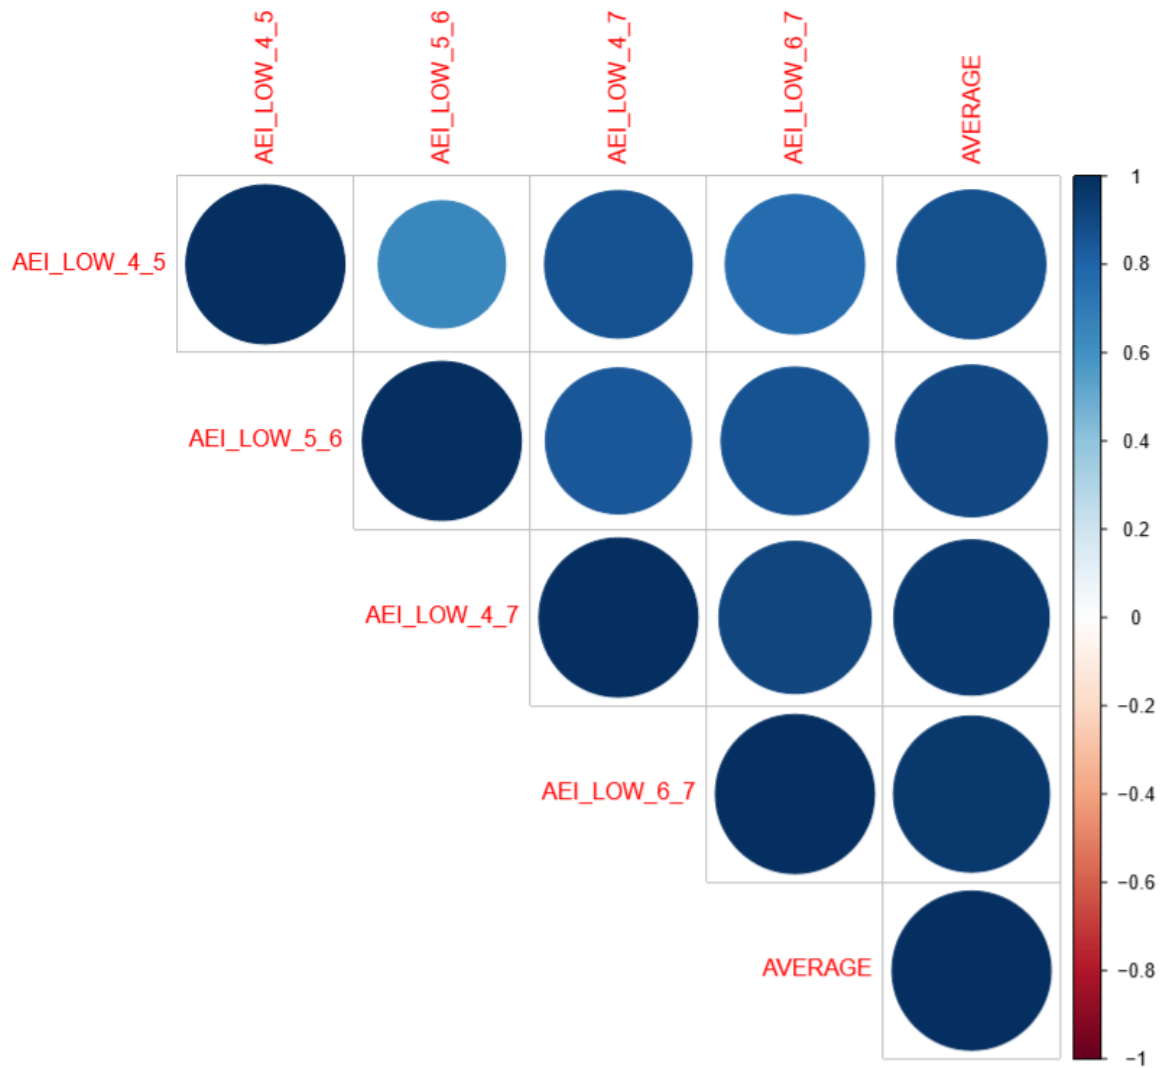

## Correlation Coefficients

|             | AEI_LOW_4_5 | AEI_LOW_5_6 | AEI_LOW_6_7 | AEI_LOW_4_7 | AVERAGE |
|-------------|-------------|-------------|-------------|-------------|---------|
| AEI_LOW_4_5 | 1.00        | 0.64        | 0.77        | 0.86        | 0.87    |
| AEI_LOW_5_6 | 0.64        | 1.00        | 0.86        | 0.84        | 0.91    |
| AEI_LOW_6_7 | 0.77        | 0.86        | 1.00        | 0.92        | 0.96    |
| AEI_LOW_4_7 | 0.86        | 0.84        | 0.92        | 1.00        | 0.95    |
| AVERAGE     | 0.87        | 0.91        | 0.96        | 0.95        | 1.00    |

## p-values

|             | AEI_LOW_4_5 | AEI_LOW_5_6 | AEI_LOW_6_7 | AEI_LOW_4_7 | AVERAGE |
|-------------|-------------|-------------|-------------|-------------|---------|
| AEI_LOW_4_5 | 0           | 0           | 0           | 0           | 0       |
| AEI_LOW_5_6 | 0           | 0           | 0           | 0           | 0       |
| AEI_LOW_6_7 | 0           | 0           | 0           | 0           | 0       |
| AEI_LOW_4_7 | 0           | 0           | 0           | 0           | 0       |
| AVERAGE     | 0           | 0           | 0           | 0           | 0       |

## AEI Ratio

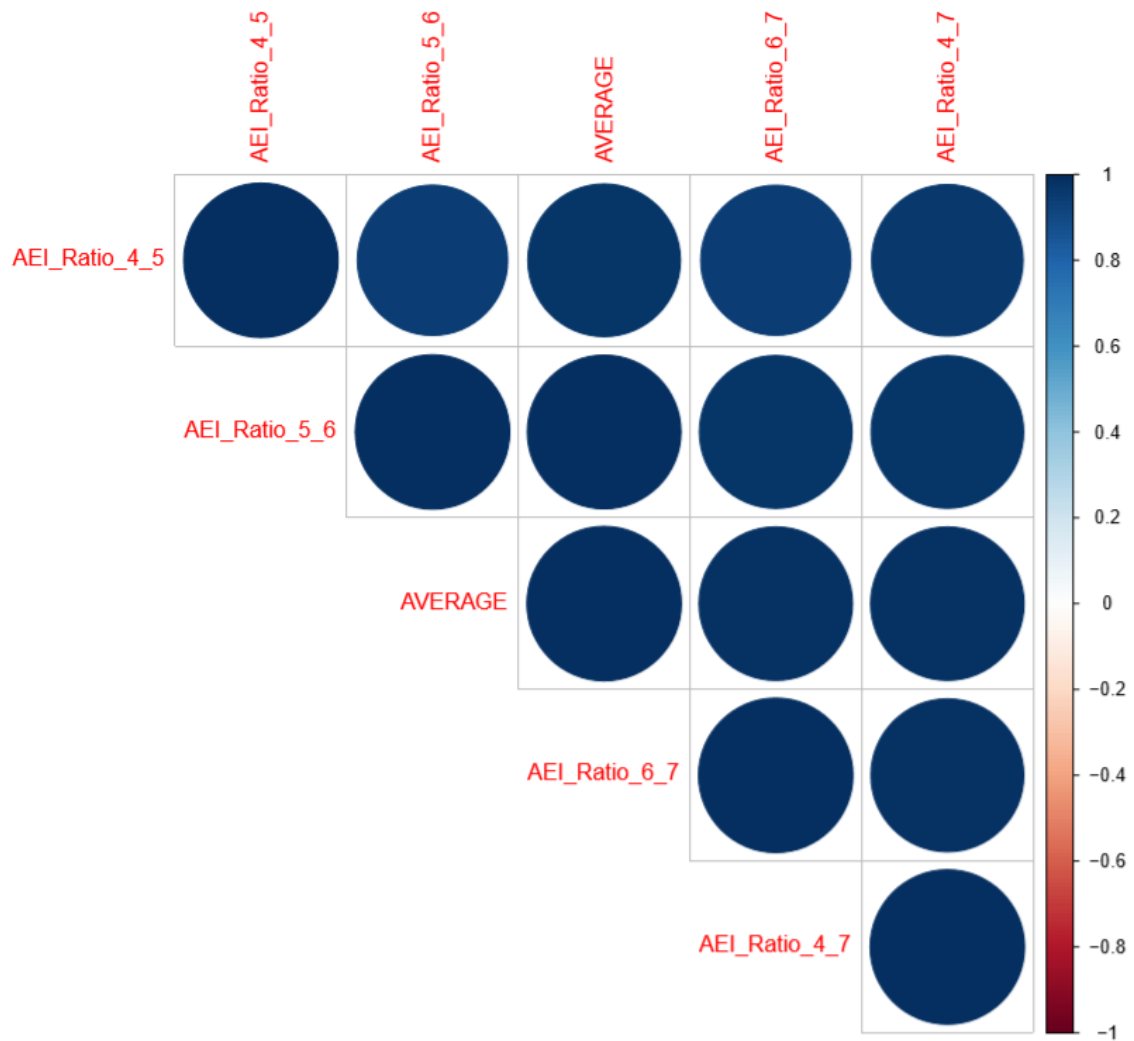

## Correlation coefficients

|               | AEI_Ratio_4_5 | AEI_Ratio_5_6 | AEI_Ratio_6_7 | AEI_Ratio_4_7 | AVERAGE |
|---------------|---------------|---------------|---------------|---------------|---------|
| AEI_Ratio_4_5 | 1.00          | 0.95          | 0.94          | 0.96          | 0.98    |
| AEI_Ratio_5_6 | 0.95          | 1.00          | 0.98          | 0.98          | 0.99    |
| AEI_Ratio_6_7 | 0.94          | 0.98          | 1.00          | 0.98          | 0.99    |
| AEI_Ratio_4_7 | 0.96          | 0.98          | 0.98          | 1.00          | 0.99    |
| AVERAGE       | 0.98          | 0.99          | 0.99          | 0.99          | 1.00    |

## p-values

|               | AEI_Ratio_4_5 | AEI_Ratio_5_6 | AEI_Ratio_6_7 | AEI_Ratio_4_7 | AVERAGE |
|---------------|---------------|---------------|---------------|---------------|---------|
| AEI_Ratio_4_5 | 0             | 0             | 0             | 0             | 0       |
| AEI_Ratio_5_6 | 0             | 0             | 0             | 0             | 0       |
| AEI_Ratio_6_7 | 0             | 0             | 0             | 0             | 0       |
| AEI_Ratio_4_7 | 0             | 0             | 0             | 0             | 0       |
| AVERAGE       | 0             | 0             | 0             | 0             | 0       |

## BI Low

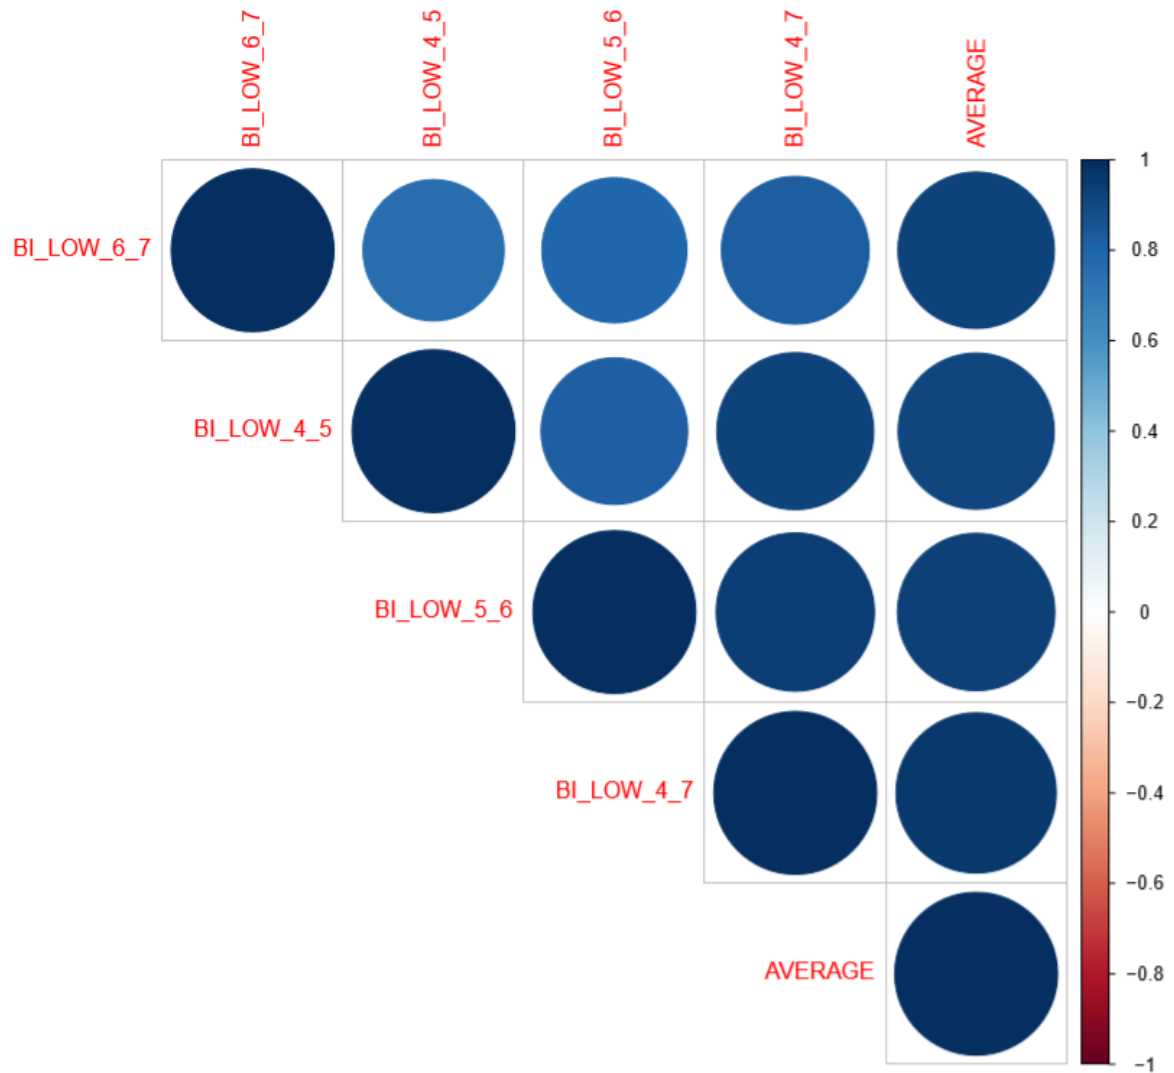

### Correlation coefficients

|            | BI_LOW_4_5 | BI_LOW_5_6 | BI_LOW_6_7 | BI_LOW_4_7 | AVERAGE |
|------------|------------|------------|------------|------------|---------|
| BI_LOW_4_5 | 1.00       | 0.81       | 0.75       | 0.93       | 0.92    |
| BI_LOW_5_6 | 0.81       | 1.00       | 0.79       | 0.94       | 0.93    |
| BI_LOW_6_7 | 0.75       | 0.79       | 1.00       | 0.82       | 0.92    |
| BI_LOW_4_7 | 0.93       | 0.94       | 0.82       | 1.00       | 0.97    |
| AVERAGE    | 0.92       | 0.93       | 0.92       | 0.97       | 1.00    |

### p-values

|            | BI_LOW_4_5 | BI_LOW_5_6 | BI_LOW_6_7 | BI_LOW_4_7 | AVERAGE |
|------------|------------|------------|------------|------------|---------|
| BI_LOW_4_5 | 0          | 0          | 0          | 0          | 0       |
| BI_LOW_5_6 | 0          | 0          | 0          | 0          | 0       |
| BI_LOW_6_7 | 0          | 0          | 0          | 0          | 0       |
| BI_LOW_4_7 | 0          | 0          | 0          | 0          | 0       |
| AVERAGE    | 0          | 0          | 0          | 0          | 0       |



## BI High

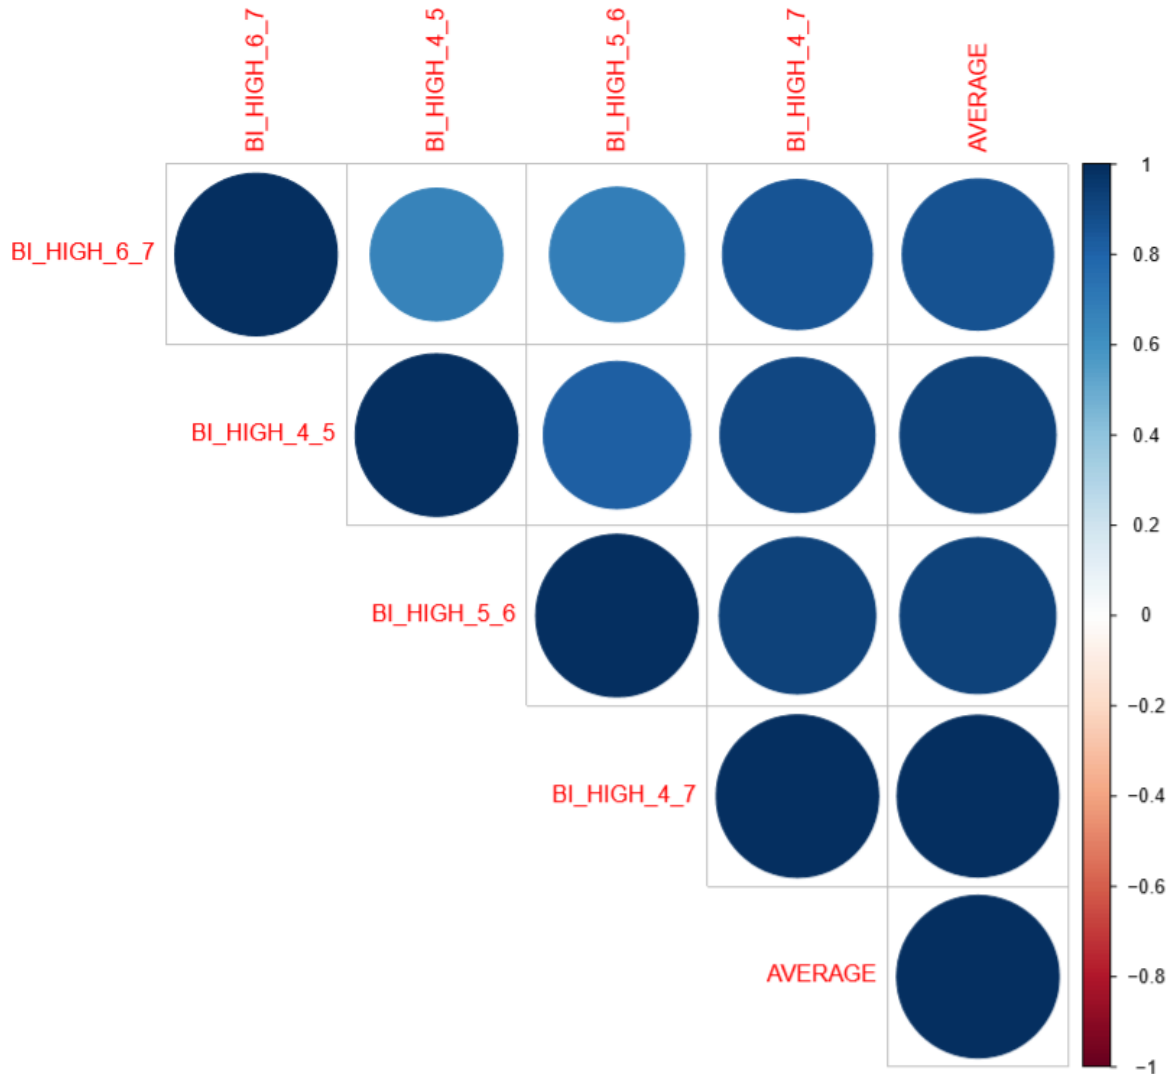

### Correlation coefficients

|             | BI_HIGH_4_5 | BI_HIGH_5_6 | BI_HIGH_6_7 | BI_HIGH_4_7 | AVERAGE |
|-------------|-------------|-------------|-------------|-------------|---------|
| BI_HIGH_4_5 | 1.00        | 0.82        | 0.67        | 0.91        | 0.92    |
| BI_HIGH_5_6 | 0.82        | 1.00        | 0.69        | 0.93        | 0.92    |
| BI_HIGH_6_7 | 0.67        | 0.69        | 1.00        | 0.85        | 0.87    |
| BI_HIGH_4_7 | 0.91        | 0.93        | 0.85        | 1.00        | 0.99    |
| AVERAGE     | 0.92        | 0.92        | 0.87        | 0.99        | 1.00    |

### p-values

|             | BI_HIGH_4_5 | BI_HIGH_5_6 | BI_HIGH_6_7 | BI_HIGH_4_7 | AVERAGE |
|-------------|-------------|-------------|-------------|-------------|---------|
| BI_HIGH_4_5 | 0           | 0           | 0           | 0           | 0       |
| BI_HIGH_5_6 | 0           | 0           | 0           | 0           | 0       |
| BI_HIGH_6_7 | 0           | 0           | 0           | 0           | 0       |
| BI_HIGH_4_7 | 0           | 0           | 0           | 0           | 0       |
| AVERAGE     | 0           | 0           | 0           | 0           | 0       |

## BI Ratio

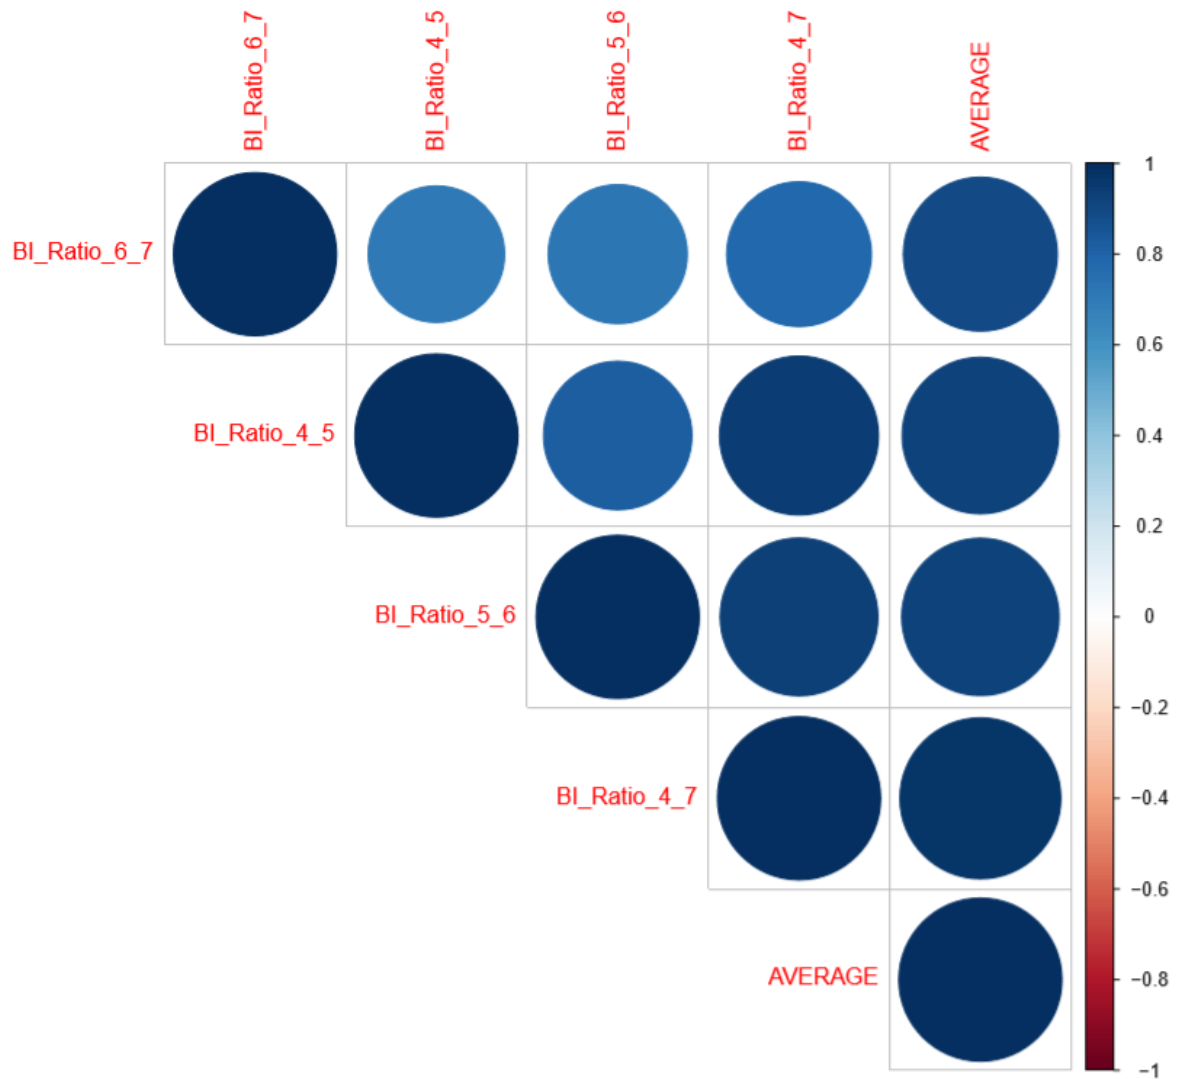

## Correlation coefficients

|              | BI_Ratio_4_5 | BI_Ratio_5_6 | BI_Ratio_6_7 | BI_Ratio_4_7 | AVERAGE |
|--------------|--------------|--------------|--------------|--------------|---------|
| BI_Ratio_4_5 | 1.00         | 0.83         | 0.70         | 0.95         | 0.92    |
| BI_Ratio_5_6 | 0.83         | 1.00         | 0.73         | 0.94         | 0.93    |
| BI_Ratio_6_7 | 0.70         | 0.73         | 1.00         | 0.79         | 0.89    |
| BI_Ratio_4_7 | 0.95         | 0.94         | 0.79         | 1.00         | 0.97    |
| AVERAGE      | 0.92         | 0.93         | 0.89         | 0.97         | 1.00    |

## p-values

|              | BI_Ratio_4_5 | BI_Ratio_5_6 | BI_Ratio_6_7 | BI_Ratio_4_7 | AVERAGE |
|--------------|--------------|--------------|--------------|--------------|---------|
| BI_Ratio_4_5 | NA           | 0            | 0            | 0            | 0       |
| BI_Ratio_5_6 | 0            | NA           | 0            | 0            | 0       |
| BI_Ratio_6_7 | 0            | 0            | NA           | 0            | 0       |
| BI_Ratio_4_7 | 0            | 0            | 0            | NA           | 0       |
| AVERAGE      | 0            | 0            | 0            | 0            | NA      |

## High RMS

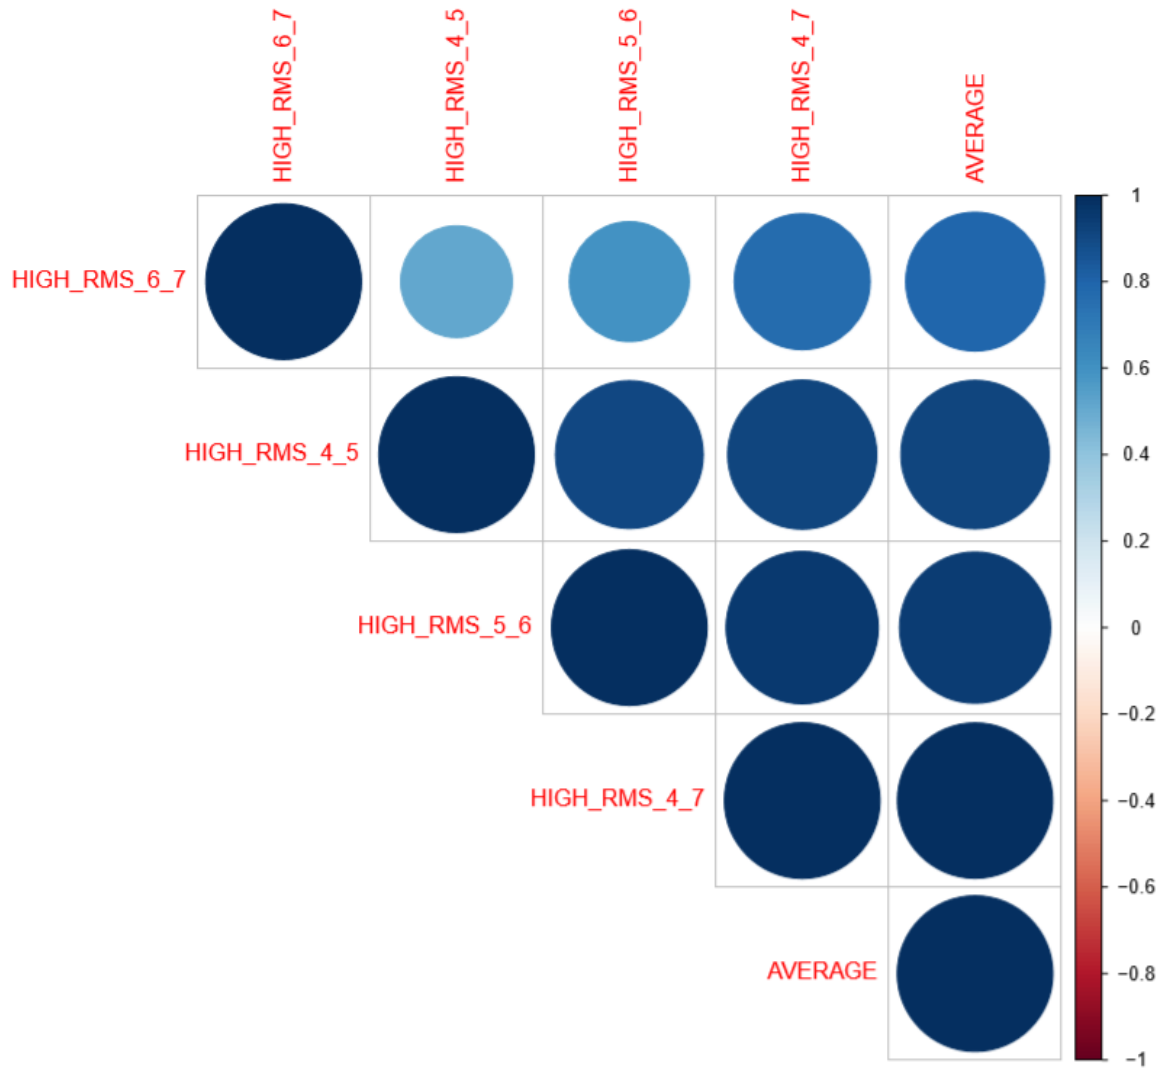

## Correlation coefficients

|              | HIGH_RMS_4_5 | HIGH_RMS_5_6 | HIGH_RMS_6_7 | HIGH_RMS_4_7 | AVERAGE |
|--------------|--------------|--------------|--------------|--------------|---------|
| HIGH_RMS_4_5 | 1.00         | 0.90         | 0.52         | 0.92         | 0.91    |
| HIGH_RMS_5_6 | 0.90         | 1.00         | 0.59         | 0.96         | 0.94    |
| HIGH_RMS_6_7 | 0.52         | 0.59         | 1.00         | 0.76         | 0.80    |
| HIGH_RMS_4_7 | 0.92         | 0.96         | 0.76         | 1.00         | 1.00    |
| AVERAGE      | 0.91         | 0.94         | 0.80         | 1.00         | 1.00    |

## p-values

|              | HIGH_RMS_4_5 | HIGH_RMS_5_6 | HIGH_RMS_6_7 | HIGH_RMS_4_7 | AVERAGE |
|--------------|--------------|--------------|--------------|--------------|---------|
| HIGH_RMS_4_5 |              | 0.0000       | 0.0018       | 0.0000       | 0.0000  |
| HIGH_RMS_5_6 | 0.0000       |              | 0.0002       | 0.0000       | 0.0000  |
| HIGH_RMS_6_7 | 0.0018       | 0.0002       |              | 0.0000       | 0.0000  |
| HIGH_RMS_4_7 | 0.0000       | 0.0000       | 0.0000       |              | 0.0000  |
| AVERAGE      | 0.0000       | 0.0000       | 0.0000       | 0.0000       |         |

## Low RMS

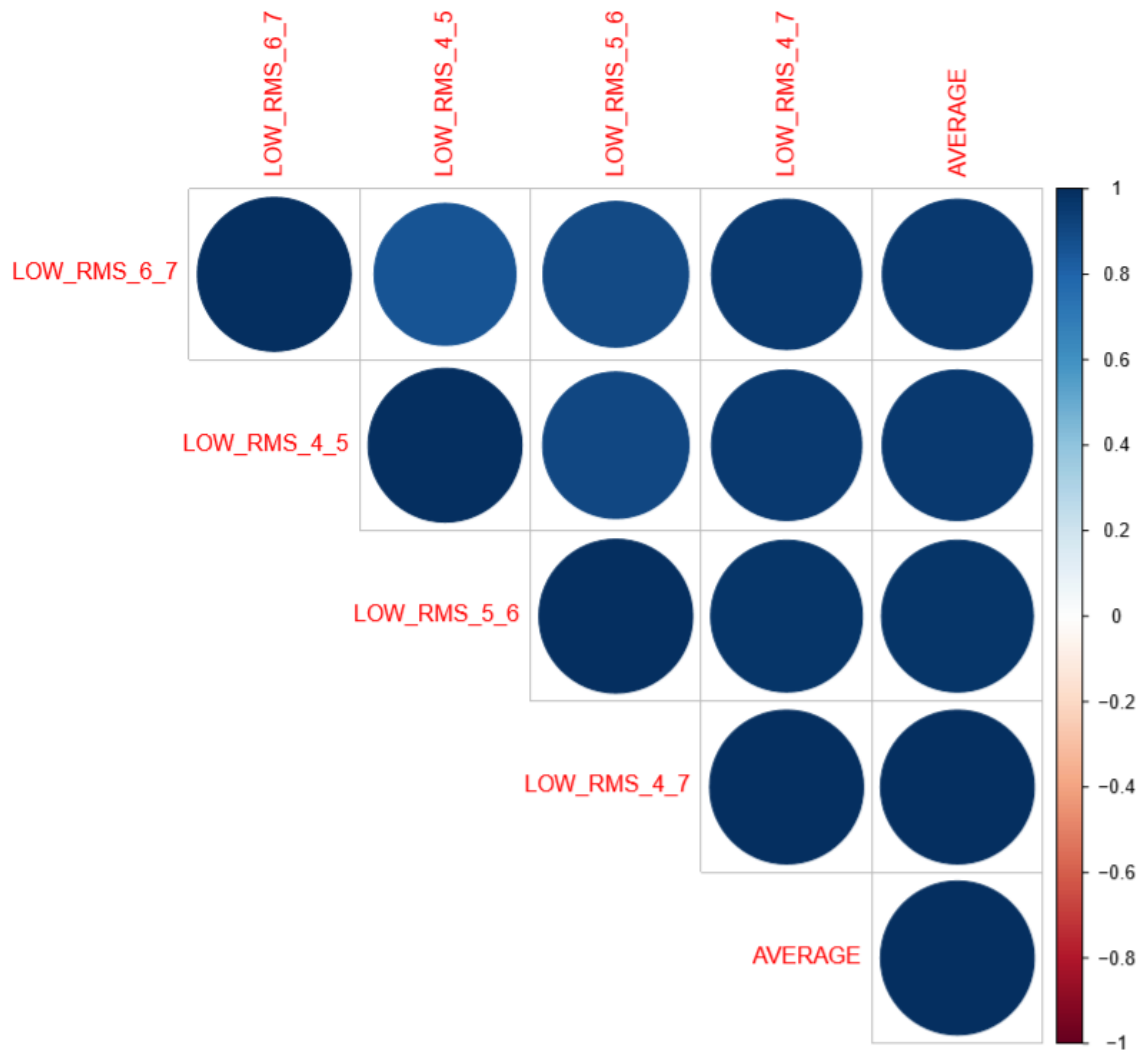

## Correlation coefficients

|             | LOW_RMS_4_5 | LOW_RMS_5_6 | LOW_RMS_6_7 | LOW_RMS_4_7 | AVERAGE |
|-------------|-------------|-------------|-------------|-------------|---------|
| LOW_RMS_4_5 | 1.00        | 0.91        | 0.85        | 0.96        | 0.96    |
| LOW_RMS_5_6 | 0.91        | 1.00        | 0.90        | 0.97        | 0.97    |
| LOW_RMS_6_7 | 0.85        | 0.90        | 1.00        | 0.95        | 0.95    |
| LOW_RMS_4_7 | 0.96        | 0.97        | 0.95        | 1.00        | 1.00    |
| AVERAGE     | 0.96        | 0.97        | 0.95        | 1.00        | 1.00    |

## p-values

|             | LOW_RMS_4_5  | LOW_RMS_5_6  | LOW_RMS_6_7  | LOW_RMS_4_7 | AVERAGE |
|-------------|--------------|--------------|--------------|-------------|---------|
| LOW_RMS_4_5 | NA           | 1.680878e-13 | 1.925970e-10 | 0           | 0       |
| LOW_RMS_5_6 | 1.680878e-13 | NA           | 7.145395e-13 | 0           | 0       |
| LOW_RMS_6_7 | 1.925970e-10 | 7.145395e-13 | NA           | 0           | 0       |
| LOW_RMS_4_7 | 0.000000e+00 | 0.000000e+00 | 0.000000e+00 | NA          | 0       |
| AVERAGE     | 0.000000e+00 | 0.000000e+00 | 0.000000e+00 | 0           | NA      |

## RMS Ratio

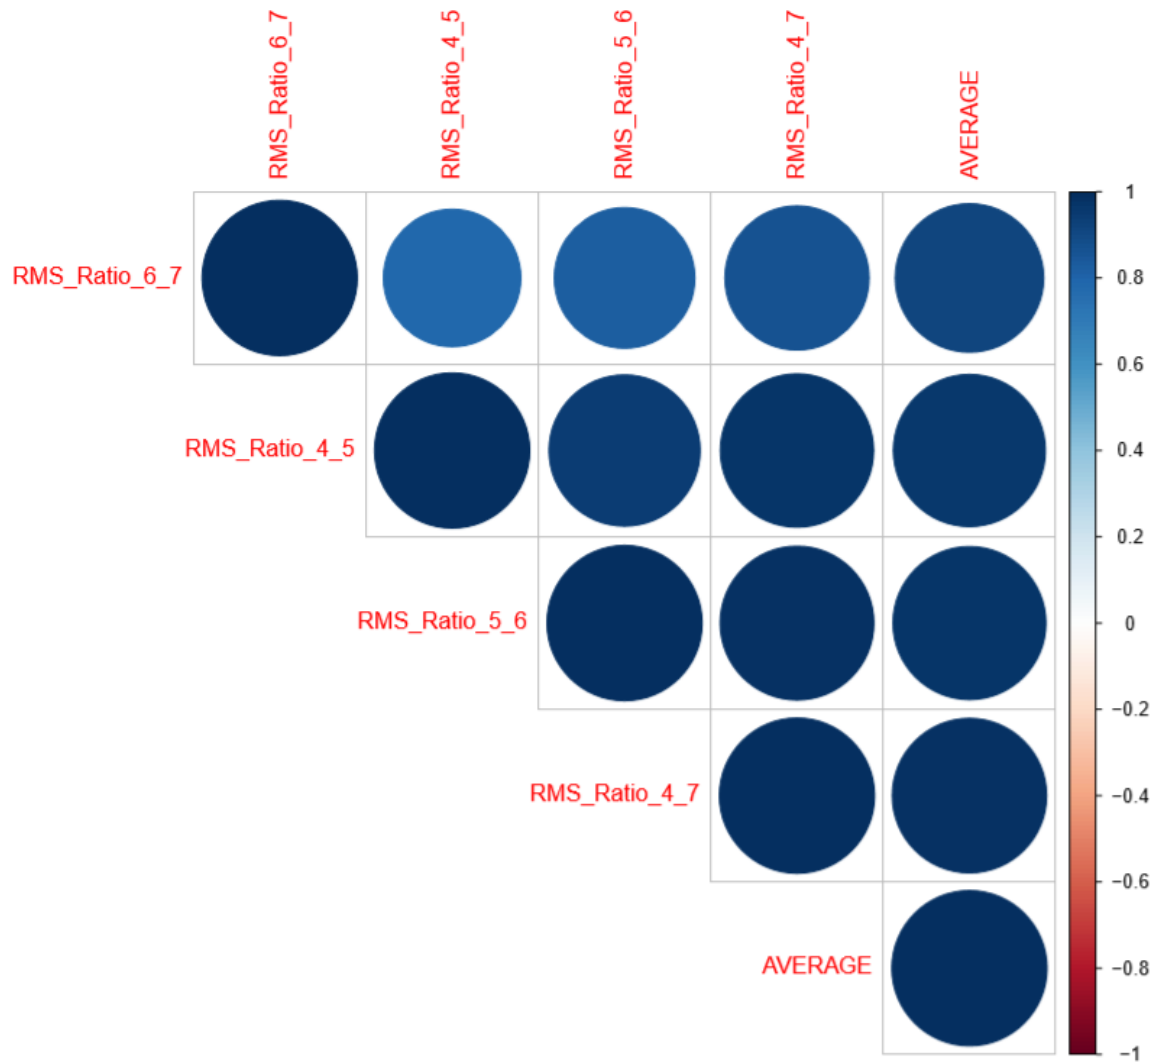

## Correlation coefficients

|               | RMS_Ratio_4_5 | RMS_Ratio_5_6 | RMS_Ratio_6_7 | RMS_Ratio_4_7 | AVERAGE |
|---------------|---------------|---------------|---------------|---------------|---------|
| RMS_Ratio_4_5 | 1.00          | 0.95          | 0.79          | 0.97          | 0.96    |
| RMS_Ratio_5_6 | 0.95          | 1.00          | 0.82          | 0.98          | 0.97    |
| RMS_Ratio_6_7 | 0.79          | 0.82          | 1.00          | 0.86          | 0.92    |
| RMS_Ratio_4_7 | 0.97          | 0.98          | 0.86          | 1.00          | 0.99    |
| AVERAGE       | 0.96          | 0.97          | 0.92          | 0.99          | 1.00    |

## p-values

|               | RMS_Ratio_4_5 | RMS_Ratio_5_6 | RMS_Ratio_6_7 | RMS_Ratio_4_7 | AVERAGE |
|---------------|---------------|---------------|---------------|---------------|---------|
| RMS_Ratio_4_5 | 0             | 0             | 0             | 0             | 0       |
| RMS_Ratio_5_6 | 0             | 0             | 0             | 0             | 0       |
| RMS_Ratio_6_7 | 0             | 0             | 0             | 0             | 0       |
| RMS_Ratio_4_7 | 0             | 0             | 0             | 0             | 0       |
| AVERAGE       | 0             | 0             | 0             | 0             | 0       |

## High Roughness

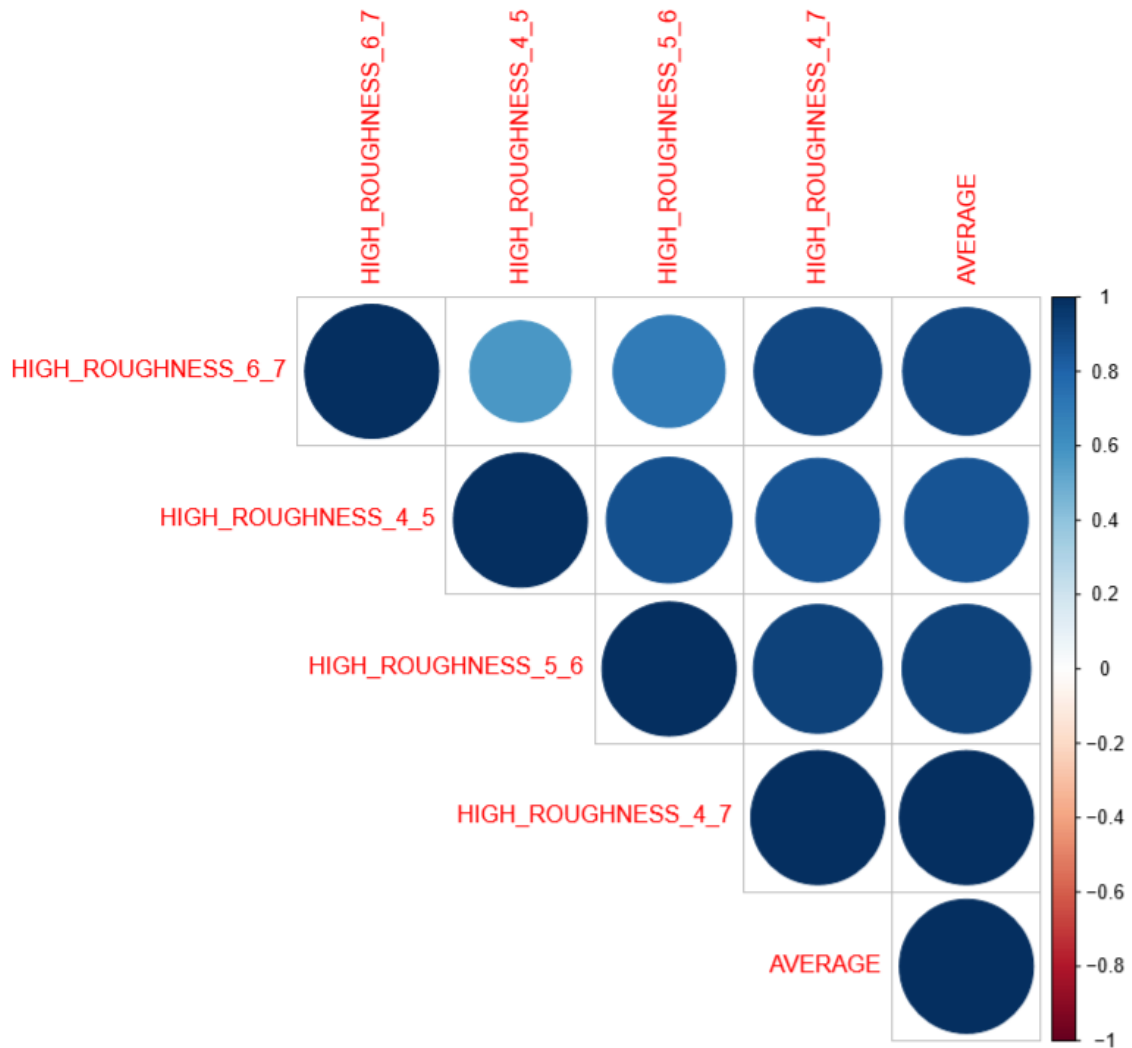

### Correlation coefficients

|                    | HIGH_ROUGHNESS_4_5 | HIGH_ROUGHNESS_5_6 | HIGH_ROUGHNESS_6_7 | HIGH_ROUGHNESS_4_7 | AVERAGE |
|--------------------|--------------------|--------------------|--------------------|--------------------|---------|
| HIGH_ROUGHNESS_4_5 | 1.00               | 0.88               | 0.57               | 0.85               | 0.85    |
| HIGH_ROUGHNESS_5_6 | 0.88               | 1.00               | 0.70               | 0.92               | 0.92    |
| HIGH_ROUGHNESS_6_7 | 0.57               | 0.70               | 1.00               | 0.90               | 0.90    |
| HIGH_ROUGHNESS_4_7 | 0.85               | 0.92               | 0.90               | 1.00               | 1.00    |
| AVERAGE            | 0.85               | 0.92               | 0.90               | 1.00               | 1.00    |

### p-values

|                    | HIGH_ROUGHNESS_4_5 | HIGH_ROUGHNESS_5_6 | HIGH_ROUGHNESS_6_7 | HIGH_ROUGHNESS_4_7 | AVERAGE |
|--------------------|--------------------|--------------------|--------------------|--------------------|---------|
| HIGH_ROUGHNESS_4_5 |                    | 0e+00              | 4e-04              | 0e+00              | 0e+00   |
| HIGH_ROUGHNESS_5_6 | 0e+00              |                    | 0e+00              | 0e+00              | 0e+00   |
| HIGH_ROUGHNESS_6_7 | 4e-04              | 0e+00              |                    | 0e+00              | 0e+00   |
| HIGH_ROUGHNESS_4_7 | 0e+00              | 0e+00              | 0e+00              |                    | 0e+00   |
| AVERAGE            | 0e+00              | 0e+00              | 0e+00              | 0e+00              |         |

## Low Roughness

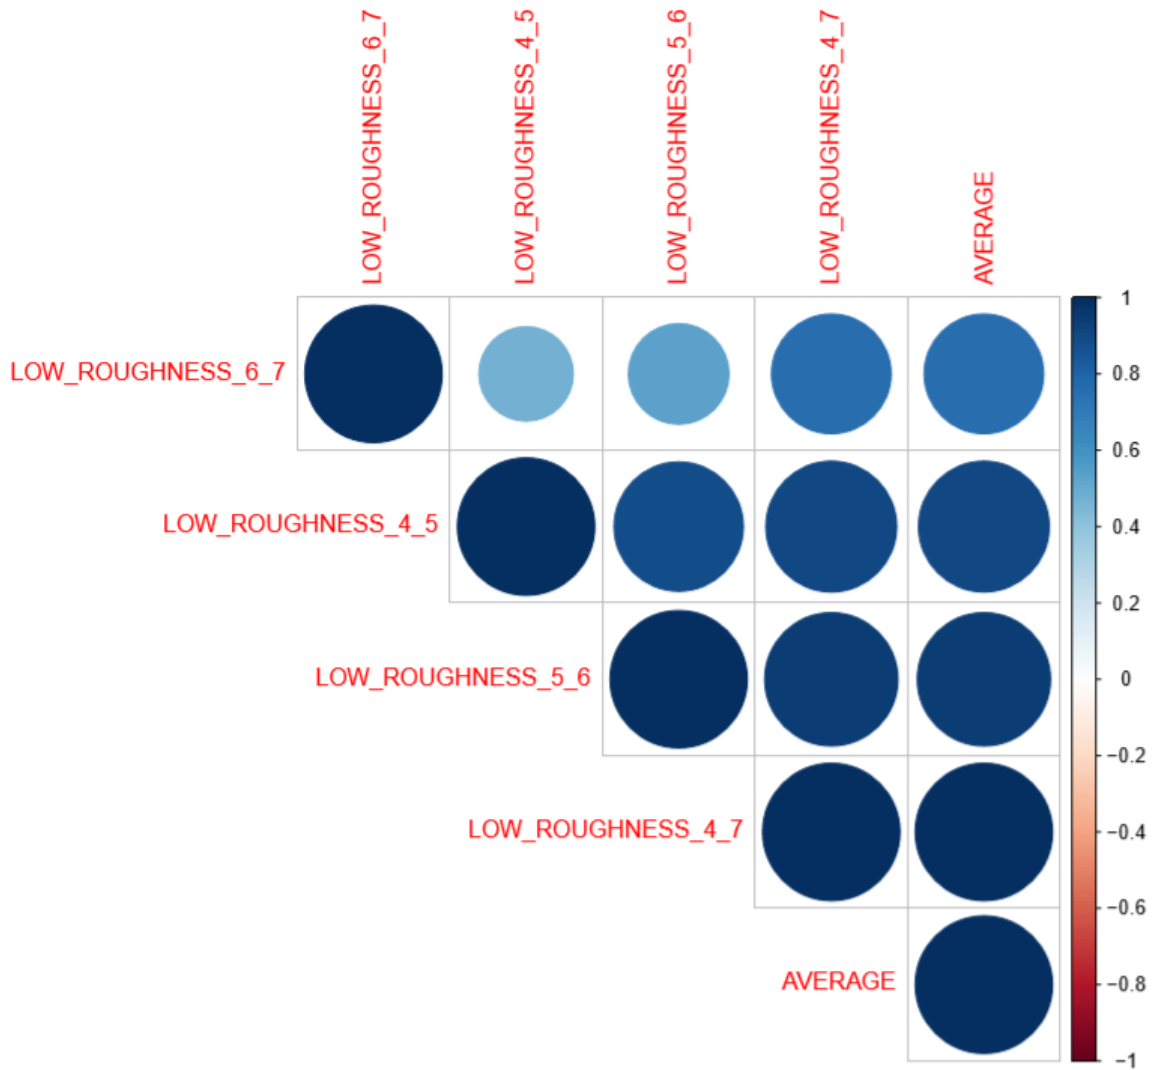

### Correlation coefficients

|                   | LOW_ROUGHNESS_4_5 | LOW_ROUGHNESS_5_6 | LOW_ROUGHNESS_6_7 | LOW_ROUGHNESS_4_7 | AVERAGE |
|-------------------|-------------------|-------------------|-------------------|-------------------|---------|
| LOW_ROUGHNESS_4_5 | 1.00              | 0.89              | 0.47              | 0.91              | 0.91    |
| LOW_ROUGHNESS_5_6 | 0.89              | 1.00              | 0.54              | 0.94              | 0.94    |
| LOW_ROUGHNESS_6_7 | 0.47              | 0.54              | 1.00              | 0.76              | 0.76    |
| LOW_ROUGHNESS_4_7 | 0.91              | 0.94              | 0.76              | 1.00              | 1.00    |
| AVERAGE           | 0.91              | 0.94              | 0.76              | 1.00              | 1.00    |

### p-values

|                   | LOW_ROUGHNESS_4_5 | LOW_ROUGHNESS_5_6 | LOW_ROUGHNESS_6_7 | LOW_ROUGHNESS_4_7 | AVERAGE |
|-------------------|-------------------|-------------------|-------------------|-------------------|---------|
| LOW_ROUGHNESS_4_5 | 0.0000            | 0.0000            | 0.0047            | 0.0000            | 0.0000  |
| LOW_ROUGHNESS_5_6 | 0.0000            | 0.0000            | 0.0010            | 0.0000            | 0.0000  |
| LOW_ROUGHNESS_6_7 | 0.0047            | 0.0010            | 0.0000            | 0.0000            | 0.0000  |
| LOW_ROUGHNESS_4_7 | 0.0000            | 0.0000            | 0.0000            | 0.0000            | 0.0000  |
| AVERAGE           | 0.0000            | 0.0000            | 0.0000            | 0.0000            | 0.0000  |

## Roughness Ratio

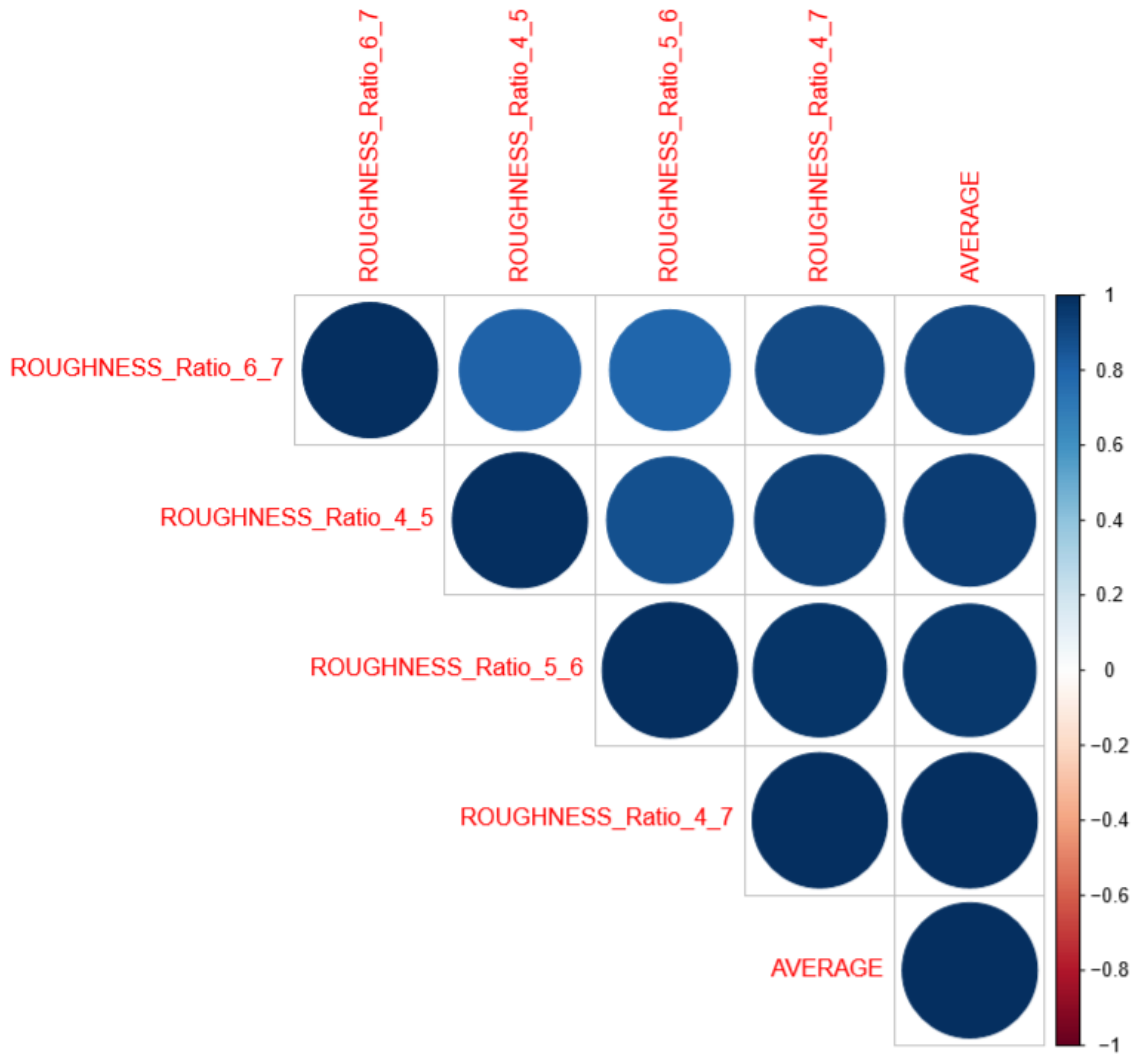

### Correlation coefficients

|                     | ROUGHNESS_Ratio_4_5 | ROUGHNESS_Ratio_5_6 | ROUGHNESS_Ratio_6_7 | ROUGHNESS_Ratio_4_7 | AVERAGE |
|---------------------|---------------------|---------------------|---------------------|---------------------|---------|
| ROUGHNESS_Ratio_4_5 | 1.00                | 0.87                | 0.80                | 0.94                | 0.95    |
| ROUGHNESS_Ratio_5_6 | 0.87                | 1.00                | 0.80                | 0.97                | 0.96    |
| ROUGHNESS_Ratio_6_7 | 0.80                | 0.80                | 1.00                | 0.90                | 0.91    |
| ROUGHNESS_Ratio_4_7 | 0.94                | 0.97                | 0.90                | 1.00                | 1.00    |
| AVERAGE             | 0.95                | 0.96                | 0.91                | 1.00                | 1.00    |

### p-values

|                     | ROUGHNESS_Ratio_4_5 | ROUGHNESS_Ratio_5_6 | ROUGHNESS_Ratio_6_7 | ROUGHNESS_Ratio_4_7 | AVERAGE |
|---------------------|---------------------|---------------------|---------------------|---------------------|---------|
| ROUGHNESS_Ratio_4_5 | 0                   | 0                   | 0                   | 0                   | 0       |
| ROUGHNESS_Ratio_5_6 | 0                   | 0                   | 0                   | 0                   | 0       |
| ROUGHNESS_Ratio_6_7 | 0                   | 0                   | 0                   | 0                   | 0       |
| ROUGHNESS_Ratio_4_7 | 0                   | 0                   | 0                   | 0                   | 0       |
| AVERAGE             | 0                   | 0                   | 0                   | 0                   | 0       |



## ACI HIGH

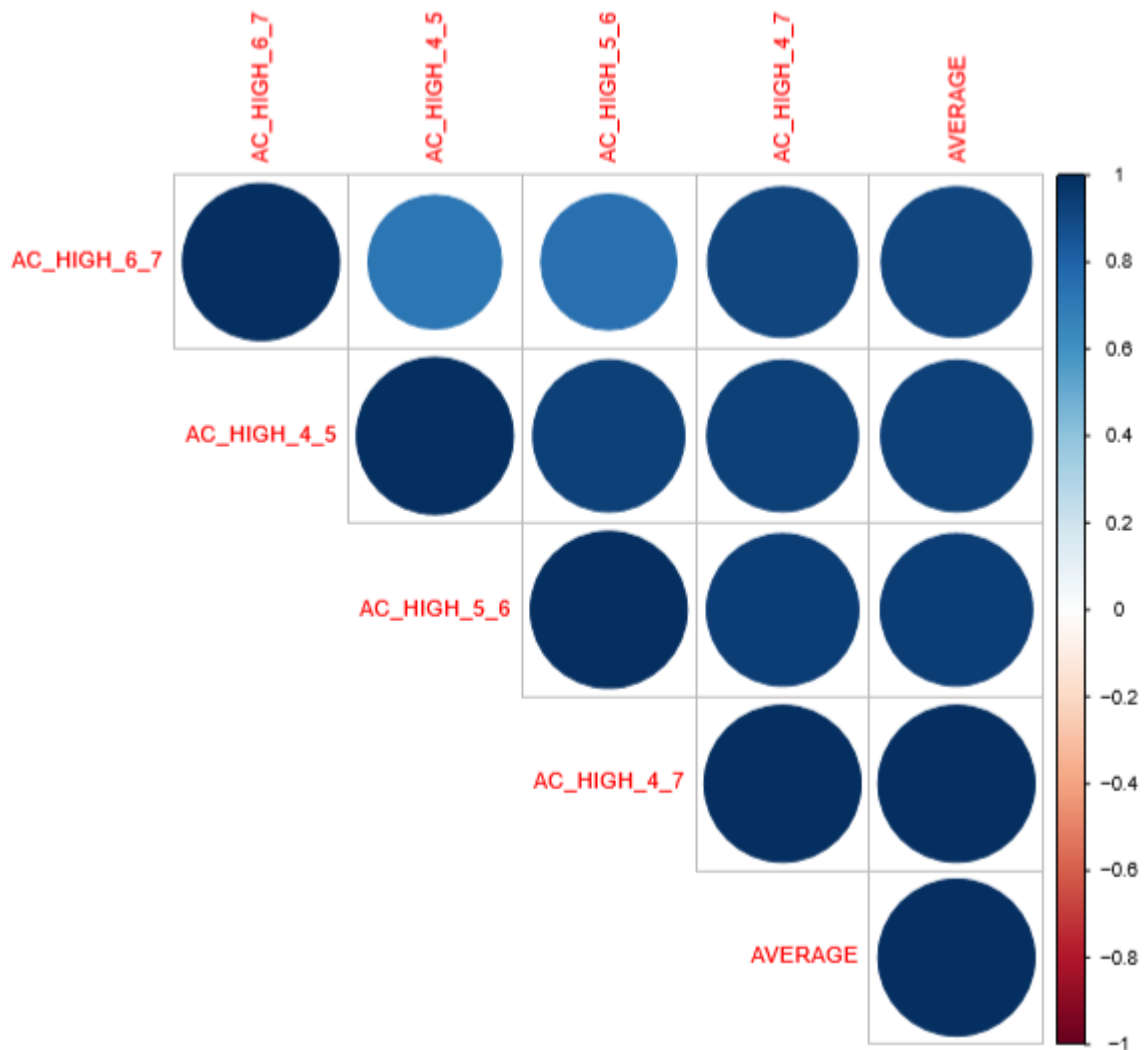

### Correlation coefficients

|             | AC_HIGH_4_5 | AC_HIGH_5_6 | AC_HIGH_6_7 | AC_HIGH_4_7 |
|-------------|-------------|-------------|-------------|-------------|
| AC_HIGH_4_5 | 1.00        | 0.94        | 0.73        | 0.93        |
| AC_HIGH_5_6 | 0.94        | 1.00        | 0.75        | 0.94        |
| AC_HIGH_6_7 | 0.73        | 0.75        | 1.00        | 0.92        |
| AC_HIGH_4_7 | 0.93        | 0.94        | 0.92        | 1.00        |

### p-values

|             | AC_HIGH_4_5 | AC_HIGH_5_6 | AC_HIGH_6_7 | AC_HIGH_4_7 |
|-------------|-------------|-------------|-------------|-------------|
| AC_HIGH_4_5 | 0           | 0           | 0           | 0           |
| AC_HIGH_5_6 | 0           | 0           | 0           | 0           |
| AC_HIGH_6_7 | 0           | 0           | 0           | 0           |
| AC_HIGH_4_7 | 0           | 0           | 0           | 0           |

## AC LOW

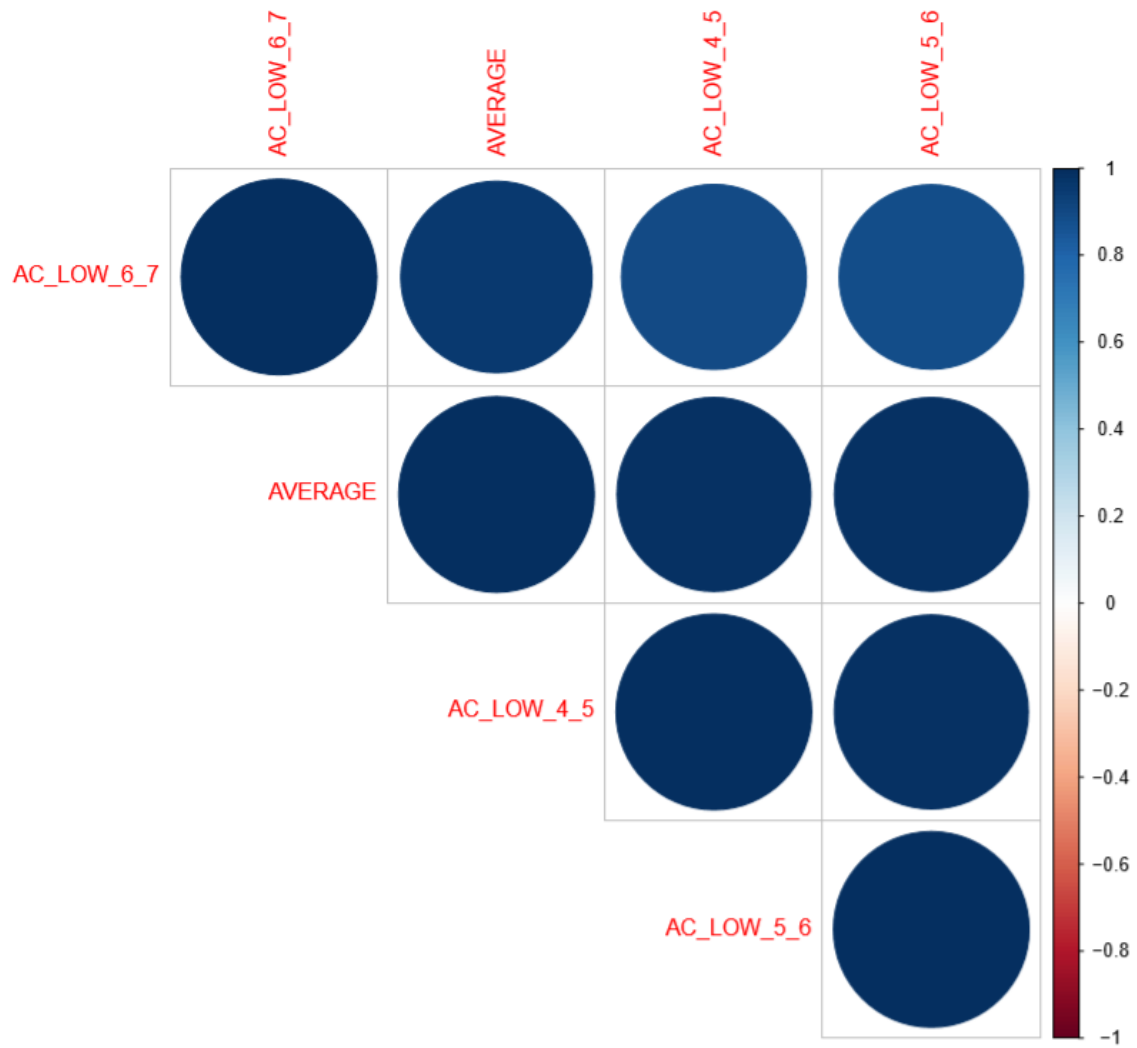

### Correlation coefficients

|            | AC_LOW_4_5 | AC_LOW_5_6 | AC_LOW_6_7 | AVERAGE |
|------------|------------|------------|------------|---------|
| AC_LOW_4_5 | 1.00       | 0.98       | 0.89       | 0.98    |
| AC_LOW_5_6 | 0.98       | 1.00       | 0.89       | 0.98    |
| AC_LOW_6_7 | 0.89       | 0.89       | 1.00       | 0.96    |
| AVERAGE    | 0.98       | 0.98       | 0.96       | 1.00    |

### p-values

|            | AC_LOW_4_5 | AC_LOW_5_6 | AC_LOW_6_7 | AVERAGE |
|------------|------------|------------|------------|---------|
| AC_LOW_4_5 | 0          | 0          | 0          | 0       |
| AC_LOW_5_6 | 0          | 0          | 0          | 0       |
| AC_LOW_6_7 | 0          | 0          | 0          | 0       |
| AVERAGE    | 0          | 0          | 0          | 0       |

## AC Ratio

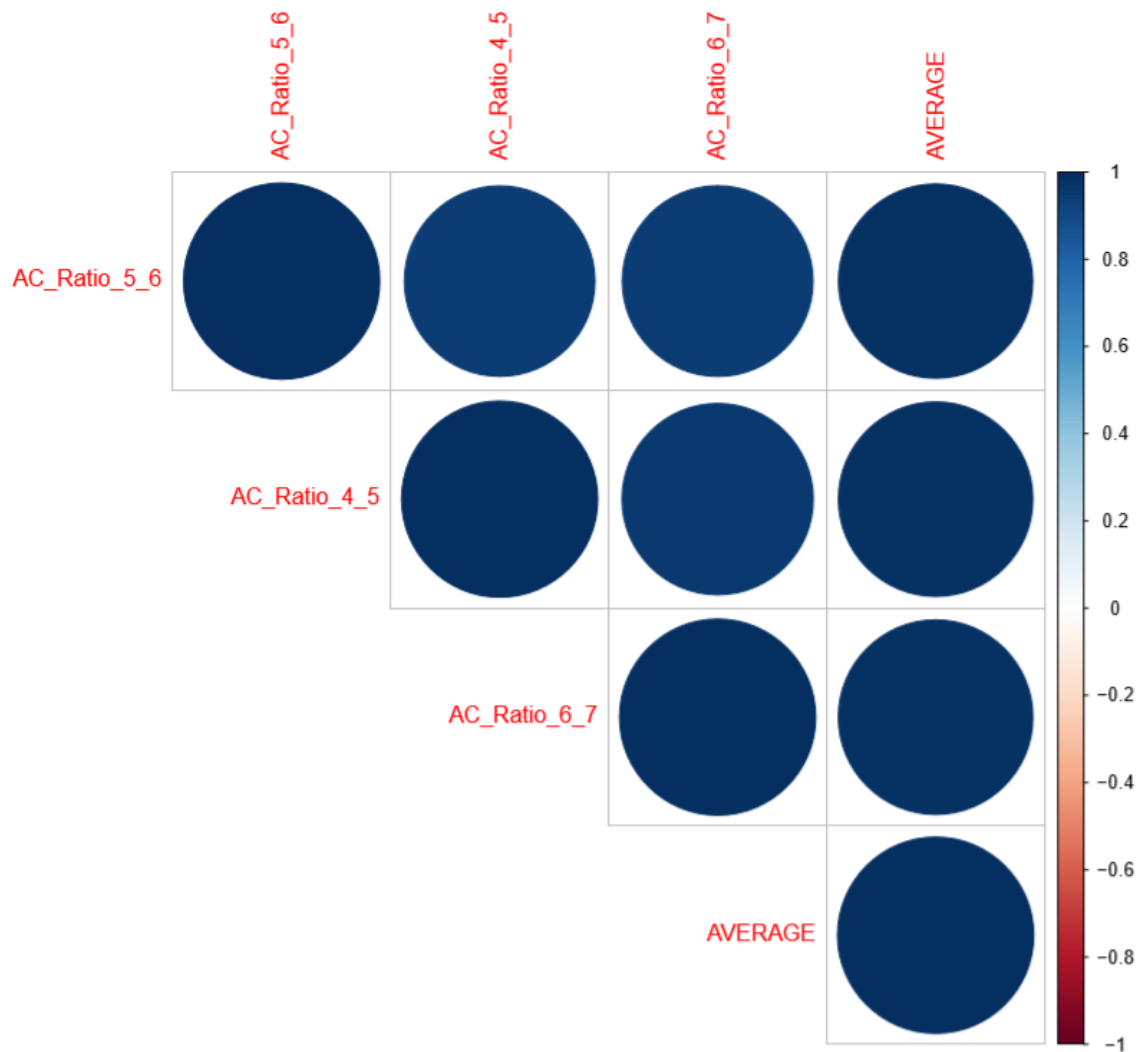

### Correlation coefficients

|              | AC_Ratio_4_5 | AC_Ratio_5_6 | AC_Ratio_6_7 | AVERAGE |
|--------------|--------------|--------------|--------------|---------|
| AC_Ratio_4_5 | 1.00         | 0.94         | 0.95         | 0.98    |
| AC_Ratio_5_6 | 0.94         | 1.00         | 0.95         | 0.98    |
| AC_Ratio_6_7 | 0.95         | 0.95         | 1.00         | 0.98    |
| AVERAGE      | 0.98         | 0.98         | 0.98         | 1.00    |

### p-values

|              | AC_Ratio_4_5 | AC_Ratio_5_6 | AC_Ratio_6_7 | AVERAGE |
|--------------|--------------|--------------|--------------|---------|
| AC_Ratio_4_5 | 0            | 0            | 0            | 0       |
| AC_Ratio_5_6 | 0            | 0            | 0            | 0       |
| AC_Ratio_6_7 | 0            | 0            | 0            | 0       |
| AVERAGE      | 0            | 0            | 0            | 0       |
