# Supplementary material for: Rapid coral reef assessment using 3D modelling and acoustics: acoustic indices correlate to fish abundance, diversity and environmental indicators in West Papua, Indonesia
Source: PeerJ journal article supplement (doi:10.7717/peerj.10761), 2021-02-08
Supplement: S2_Acoustic_Index_GLM_Models.pdf [file S2_Acoustic_Index_GLM_Models.pdf]

## S2. Acoustic Index GLM Model summaries

### a) Fish Abundance

| Model | Model name                 | Intercept    | Predictor    | slope p     | Anova null  | Deviance explained |
|-------|----------------------------|--------------|--------------|-------------|-------------|--------------------|
| 14    | model_fish_AEI_HIGH        | 2.357471977  | 4.342293988  | 1.1698E-236 | 7.4002E-282 | 40.0%              |
| 7     | model_fish_AC_LOW          | 8.413984519  | -0.030357302 | 7.766E-235  | 9.3549E-271 | 38.4%              |
| 3     | model_fish_RMS_Ratio       | 3.443383707  | 0.063992354  | 7.8297E-223 | 5.7563E-236 | 33.5%              |
| 8     | model_fish_AC_HIGH         | 12.3634033   | -0.006267225 | 5.431E-195  | 1.4121E-232 | 33.0%              |
| 9     | model_fish_AC_Ratio        | 10.11268859  | -54.43205162 | 2.0552E-194 | 1.3176E-223 | 31.7%              |
| 11    | model_fish_AD_HIGH         | 7.893873292  | -1.747025788 | 5.04E-217   | 1.3131E-219 | 31.1%              |
| 17    | model_fish_BI_HIGH         | 8.936499752  | -0.288649423 | 1.24E-168   | 1.0531E-166 | 23.6%              |
| 15    | model_fish_AEI_Ratio       | 5.624791826  | -2.789763802 | 2.7166E-134 | 1.0848E-164 | 23.3%              |
| 12    | model_fish_AD_Ratio        | 2.377478482  | 1.708969567  | 1.2214E-176 | 1.813E-161  | 22.8%              |
| 1     | model_fish_HIGH_RMS        | 6.397856067  | -0.002844679 | 1.2099E-135 | 2.2252E-150 | 21.2%              |
| 18    | model_fish_BI_Ratio        | 3.450210798  | 11.10670437  | 1.7463E-141 | 2.0833E-132 | 18.7%              |
| 2     | model_fish_LOW_RMS         | 3.730937767  | 9.22415E-05  | 1.1566E-129 | 4.9422E-126 | 17.7%              |
| 16    | model_fish_BI_LOW          | 3.718879708  | 0.618948416  | 1.01597E-67 | 1.14669E-61 | 8.5%               |
| 5     | model_fish_HIGH_ROUGHNESS  | 5.388788228  | -1.05097E-11 | 3.10681E-47 | 7.88659E-50 | 6.9%               |
| 6     | model_fish_ROUGHNESS_Ratio | 4.551031392  | 0.829609795  | 3.07976E-17 | 2.04343E-16 | 2.1%               |
| 10    | model_fish_AD_LOW          | -3.908771555 | 3.56520779   | 7.97072E-13 | 5.29476E-13 | 1.6%               |
| 4     | model_fish_LOW_ROUGHNESS   | 4.584453052  | 1.20625E-11  | 1.76453E-11 | 5.59234E-11 | 1.3%               |
| 13    | model_fish_AEI_LOW         | 4.848573324  | -0.794371976 | 0.015186739 | 0.015407269 | 0.2%               |

## b) Fish Species Diversity

| Model | Model name                 | Intercept | Predictor    | slope p     | Anova null  | Deviance explained |
|-------|----------------------------|-----------|--------------|-------------|-------------|--------------------|
| 1     | model_fish_HIGH_RMS        | 6.397856  | -0.002844679 | 1.2099E-135 | 2.2252E-150 | 0.212212698        |
| 2     | model_fish_LOW_RMS         | 3.730938  | 9.22415E-05  | 1.1566E-129 | 4.9422E-126 | 0.177390762        |
| 3     | model_fish_RMS_Ratio       | 3.443384  | 0.063992354  | 7.8297E-223 | 5.7563E-236 | 0.33467873         |
| 4     | model_fish_LOW_ROUGHNESS   | 4.584453  | 1.20625E-11  | 1.76453E-11 | 5.59234E-11 | 0.013363116        |
| 5     | model_fish_HIGH_ROUGHNESS  | 5.388788  | -1.05097E-11 | 3.10681E-47 | 7.88659E-50 | 0.068520883        |
| 6     | model_fish_ROUGHNESS_Ratio | 4.551031  | 0.829609795  | 3.07976E-17 | 2.04343E-16 | 0.021016172        |
| 7     | model_fish_AC_LOW          | 8.413985  | -0.030357302 | 7.766E-235  | 9.3549E-271 | 0.384472568        |
| 8     | model_fish_AC_HIGH         | 12.3634   | -0.006267225 | 5.431E-195  | 1.4121E-232 | 0.329827343        |
| 9     | model_fish_AC_Ratio        | 10.11269  | -54.43205162 | 2.0552E-194 | 1.3176E-223 | 0.316989879        |
| 10    | model_fish_AD_LOW          | -3.90877  | 3.56520779   | 7.97072E-13 | 5.29476E-13 | 0.016204555        |
| 11    | model_fish_AD_HIGH         | 7.893873  | -1.747025788 | 5.04E-217   | 1.3131E-219 | 0.311267493        |
| 12    | model_fish_AD_Ratio        | 2.377478  | 1.708969567  | 1.2214E-176 | 1.813E-161  | 0.228075768        |
| 13    | model_fish_AEI_LOW         | 4.848573  | -0.794371976 | 0.015186739 | 0.015407269 | 0.001825777        |
| 14    | model_fish_AEI_HIGH        | 2.357472  | 4.342293988  | 1.1698E-236 | 7.4002E-282 | 0.400363797        |
| 15    | model_fish_AEI_Ratio       | 5.624792  | -2.789763802 | 2.7166E-134 | 1.0848E-164 | 0.23268669         |
| 16    | model_fish_BI_LOW          | 3.71888   | 0.618948416  | 1.01597E-67 | 1.14669E-61 | 0.085410543        |
| 17    | model_fish_BI_HIGH         | 8.9365    | -0.288649423 | 1.24E-168   | 1.0531E-166 | 0.235566454        |
| 18    | model_fish_BI_Ratio        | 3.450211  | 11.10670437  | 1.7463E-141 | 2.0833E-132 | 0.186507927        |

**c) Fish > 30cm length**

| <b>Model</b> | <b>Model name</b>          | <b>Intercept</b> | <b>Predictor</b> | <b>slope p</b> | <b>Anova null</b> | <b>Deviance explained</b> |
|--------------|----------------------------|------------------|------------------|----------------|-------------------|---------------------------|
| 1            | model_fish_HIGH_RMS        | 2.538073         | -0.001338674     | 0.004836537    | 0.003899941       | 2.1%                      |
| 2            | model_fish_LOW_RMS         | 0.070592         | 0.000145222      | 2.64423E-17    | 2.94563E-17       | 18.3%                     |
| 3            | model_fish_RMS_Ratio       | 0.46802          | 0.062748558      | 2.96956E-12    | 7.43662E-13       | 13.2%                     |
| 4            | model_fish_LOW_ROUGHNESS   | 1.422775         | 2.43109E-11      | 0.001154191    | 0.001943034       | 2.5%                      |
| 5            | model_fish_HIGH_ROUGHNESS  | 1.940599         | -3.34171E-12     | 0.280495189    | 0.27716012        | 0.3%                      |
| 6            | model_fish_ROUGHNESS_Ratio | 1.577994         | 0.691006872      | 0.122264283    | 0.130843987       | 0.6%                      |
| 7            | model_fish_AC_LOW          | 5.641112         | -0.032373718     | 2.41031E-14    | 1.29182E-16       | 17.5%                     |
| 8            | model_fish_AC_HIGH         | 13.04746         | -0.009391023     | 3.18913E-17    | 2.52295E-23       | 25.3%                     |
| 9            | model_fish_AC_Ratio        | 6.087142         | -43.83561536     | 2.67385E-08    | 4.29675E-09       | 8.8%                      |
| 10           | model_fish_AD_LOW          | -29.4125         | 12.82466821      | 1.10525E-07    | 3.42456E-08       | 7.8%                      |
| 11           | model_fish_AD_HIGH         | 4.059138         | -1.270842002     | 2.63057E-07    | 2.98158E-07       | 6.7%                      |
| 12           | model_fish_AD_Ratio        | 0.220252         | 1.112039559      | 8.7918E-05     | 0.000155515       | 3.7%                      |
| 13           | model_fish_AEI_LOW         | 2.623153         | -6.128954842     | 2.19437E-05    | 2.29536E-05       | 4.6%                      |
| 14           | model_fish_AEI_HIGH        | -0.15345         | 3.501070702      | 4.77153E-10    | 3.13853E-11       | 11.3%                     |
| 15           | model_fish_AEI_Ratio       | 2.987779         | -4.188454058     | 9.29878E-13    | 7.14882E-17       | 17.8%                     |
| 16           | model_fish_BI_LOW          | -0.02879         | 1.042310346      | 5.06901E-13    | 2.58433E-11       | 11.4%                     |
| 17           | model_fish_BI_HIGH         | 6.727298         | -0.345096682     | 2.36153E-13    | 2.22274E-13       | 13.8%                     |
| 18           | model_fish_BI_Ratio        | -0.15482         | 15.81407937      | 1.81183E-16    | 1.67704E-15       | 16.2%                     |

**d) Coral Health indicators**

| <b>Model</b> | <b>Model name</b>          | <b>Intercept</b> | <b>Predictor</b> | <b>slope p</b> | <b>Anova null</b> | <b>Deviance explained</b> |
|--------------|----------------------------|------------------|------------------|----------------|-------------------|---------------------------|
| 1            | model_fish_HIGH_RMS        | 0.308023         | -0.001073722     | 0.416134013    | 0.407227262       | 0.014574326               |
| 2            | model_fish_LOW_RMS         | -0.55045         | 1.98924E-05      | 0.693004049    | 0.695004103       | 0.00326168                |
| 3            | model_fish_RMS_Ratio       | -0.83381         | 0.026261427      | 0.280207797    | 0.281925863       | 0.024565973               |
| 4            | model_fish_LOW_ROUGHNESS   | -0.28607         | -6.02214E-12     | 0.814001897    | 0.811467392       | 0.001207273               |
| 5            | model_fish_HIGH_ROUGHNESS  | 0.543384         | -1.4459E-11      | 0.129952985    | 0.114255568       | 0.052925411               |
| 6            | model_fish_ROUGHNESS_Ratio | -0.39314         | 0.208478861      | 0.874761686    | 0.875633501       | 0.000519725               |
| 7            | model_fish_AC_LOW          | -0.31852         | -0.000255358     | 0.980126834    | 0.98012794        | 1.31644E-05               |
| 8            | model_fish_AC_HIGH         | 0.466691         | -0.000656085     | 0.765196799    | 0.764426812       | 0.001905467               |
| 9            | model_fish_AC_Ratio        | -0.64285         | 2.838510771      | 0.880919376    | 0.881253371       | 0.000473473               |
| 10           | model_fish_AD_LOW          | 5.59185          | -2.458382642     | 0.685957822    | 0.68724467        | 0.003439126               |
| 11           | model_fish_AD_HIGH         | 1.986886         | -1.271174604     | 0.067757964    | 0.069019514       | 0.07015105                |
| 12           | model_fish_AD_Ratio        | -2.10904         | 1.295194429      | 0.099772808    | 0.11375642        | 0.053071694               |
| 13           | model_fish_AEI_LOW         | -0.70134         | 2.18823008       | 0.608061119    | 0.605075707       | 0.005673899               |
| 14           | model_fish_AEI_HIGH        | -1.85909         | 2.857187277      | 0.061162058    | 0.049569327       | 0.081816386               |
| 15           | model_fish_AEI_Ratio       | 0.155439         | -1.467563523     | 0.23829149     | 0.213669257       | 0.032811477               |
| 16           | model_fish_BI_LOW          | -0.02184         | -0.214127673     | 0.692323315    | 0.688362723       | 0.003413222               |
| 17           | model_fish_BI_HIGH         | 1.824662         | -0.147039986     | 0.269362841    | 0.274763171       | 0.025309219               |
| 18           | model_fish_BI_Ratio        | -0.44447         | 0.868312525      | 0.888438658    | 0.888861157       | 0.000414364               |

**e) Fishing Pressure indicators**

| <b>Model</b> | <b>Model name</b>          | <b>Intercept</b> | <b>Predictor</b> | <b>slope p</b> | <b>Anova null</b> | <b>Deviance explained</b> |
|--------------|----------------------------|------------------|------------------|----------------|-------------------|---------------------------|
| 1            | model_fish_HIGH_RMS        | -1.00631         | 0.000749434      | 0.568481879    | 0.572835579       | 0.005567322               |
| 2            | model_fish_LOW_RMS         | -2.08636         | 0.000138431      | 0.008502727    | 0.00877061        | 0.120271551               |
| 3            | model_fish_RMS_Ratio       | -1.40574         | 0.045874392      | 0.087197071    | 0.084756373       | 0.052024938               |
| 4            | model_fish_LOW_ROUGHNESS   | -0.89047         | 2.92465E-11      | 0.190843873    | 0.215724001       | 0.026834823               |
| 5            | model_fish_HIGH_ROUGHNESS  | -1.12362         | 8.58479E-12      | 0.341931837    | 0.345872425       | 0.015557899               |
| 6            | model_fish_ROUGHNESS_Ratio | -0.62983         | 0.520124215      | 0.709670709    | 0.714406594       | 0.002344783               |
| 7            | model_fish_AC_LOW          | 1.91856          | -0.019697502     | 0.094894491    | 0.085420268       | 0.051803986               |
| 8            | model_fish_AC_HIGH         | 7.637812         | -0.00670674      | 0.023703672    | 0.012519242       | 0.109185567               |
| 9            | model_fish_AC_Ratio        | 1.563097         | -20.64735835     | 0.353734232    | 0.342568998       | 0.0157724                 |
| 10           | model_fish_AD_LOW          | -20.1345         | 8.088189873      | 0.254931081    | 0.245116044       | 0.023653994               |
| 11           | model_fish_AD_HIGH         | 1.791985         | -1.258164154     | 0.097069789    | 0.098668749       | 0.04774705                |
| 12           | model_fish_AD_Ratio        | -1.91453         | 1.032925652      | 0.239108253    | 0.255379318       | 0.022650819               |
| 13           | model_fish_AEI_LOW         | 0.098336         | -4.136651901     | 0.35128254     | 0.353879622       | 0.01504931                |
| 14           | model_fish_AEI_HIGH        | -2.27414         | 3.285402325      | 0.053970234    | 0.041032232       | 0.073096401               |
| 15           | model_fish_AEI_Ratio       | 0.369568         | -2.765067997     | 0.075602075    | 0.049003231       | 0.067853358               |
| 16           | model_fish_BI_LOW          | -1.19785         | 0.42081739       | 0.413977247    | 0.428805433       | 0.010961908               |
| 17           | model_fish_BI_HIGH         | 2.690121         | -0.218684891     | 0.128448322    | 0.132535547       | 0.039616027               |
| 18           | model_fish_BI_Ratio        | -1.28365         | 6.822141846      | 0.277726541    | 0.289900885       | 0.019612011               |

**f) Algal Control indicators**

| <b>Model</b> | <b>Model name</b>          | <b>Intercept</b> | <b>Predictor</b> | <b>slope p</b> | <b>Anova null</b> | <b>Deviance explained</b> |
|--------------|----------------------------|------------------|------------------|----------------|-------------------|---------------------------|
| 1            | model_fish_HIGH_RMS        | 2.167579         | -0.001263214     | 0.02331643     | 0.020339986       | 0.037649768               |
| 2            | model_fish_LOW_RMS         | 0.149494         | 0.000113176      | 1.72766E-08    | 2.48238E-08       | 0.217366387               |
| 3            | model_fish_RMS_Ratio       | 0.311787         | 0.055164251      | 1.20103E-07    | 7.19896E-08       | 0.202924439               |
| 4            | model_fish_LOW_ROUGHNESS   | 1.059823         | 2.70025E-11      | 0.001847164    | 0.00311092        | 0.061143948               |
| 5            | model_fish_HIGH_ROUGHNESS  | 2.275573         | -1.42027E-11     | 0.000355279    | 0.000198396       | 0.096852566               |
| 6            | model_fish_ROUGHNESS_Ratio | 1.021867         | 1.667401891      | 0.000518753    | 0.000962618       | 0.076231041               |
| 7            | model_fish_AC_LOW          | 3.827045         | -0.019611377     | 1.40983E-05    | 7.78572E-06       | 0.139826077               |
| 8            | model_fish_AC_HIGH         | 5.431397         | -0.003273105     | 0.000848416    | 0.000570886       | 0.083019339               |
| 9            | model_fish_AC_Ratio        | 5.379683         | -39.91039586     | 1.26146E-05    | 4.5533E-06        | 0.147008311               |
| 10           | model_fish_AD_LOW          | -14.7665         | 6.668168288      | 0.013212296    | 0.011783433       | 0.044369679               |
| 11           | model_fish_AD_HIGH         | 4.047252         | -1.449136926     | 6.49891E-07    | 6.73487E-07       | 0.172700337               |
| 12           | model_fish_AD_Ratio        | -0.60499         | 1.466805228      | 6.02732E-06    | 1.44963E-05       | 0.1315225                 |
| 13           | model_fish_AEI_LOW         | 2.00124          | -4.026503723     | 0.017908308    | 0.018539798       | 0.038782478               |
| 14           | model_fish_AEI_HIGH        | -0.45478         | 3.458419094      | 1.61133E-07    | 2.39328E-08       | 0.217862709               |
| 15           | model_fish_AEI_Ratio       | 2.39742          | -3.163074403     | 3.60366E-07    | 1.04163E-08       | 0.229165963               |
| 16           | model_fish_BI_LOW          | -0.06991         | 0.883714124      | 5.38317E-07    | 2.89719E-06       | 0.153072224               |
| 17           | model_fish_BI_HIGH         | 4.133793         | -0.185739419     | 0.000777628    | 0.0008927         | 0.077208467               |
| 18           | model_fish_BI_Ratio        | 0.057177         | 11.61806477      | 4.87845E-07    | 1.16119E-06       | 0.165362301               |
